# Supplementary material for: Self-assembled PROTACs enable glycoproteins degradation in the living cells
Source: Chem Sci. 2025 Apr 2;16(18):8060–8. doi: 10.1039/d5sc00400d (PMC11976659; doi:10.1039/d5sc00400d)
Supplement: SC-016-D5SC00400D-s002 [file SC-016-D5SC00400D-s002.xlsx]

## Sheet: all identified PGs
T: Protein.Names	T: Genes
A0A024R4E5_HUMAN;C9J5E5_HUMAN;C9JBS3_HUMAN;C9JEJ8_HUMAN;C9JES8_HUMAN;C9JHN6_HUMAN;C9JHS7_HUMAN;C9JHZ8_HUMAN;C9JIZ1_HUMAN;C9JK79_HUMAN;C9JT62_HUMAN;C9JZI8_HUMAN	HDLBP
A0A024RAC6_HUMAN	ELOA
A0A087WUL4_HUMAN;A0A087WX23_HUMAN;A0A087WZG9_HUMAN;B4DSP0_HUMAN	PEG10
A0A087WWY3_HUMAN;Q60FE5_HUMAN	FLNA
A0A096LP07_HUMAN;A0A096LPJ3_HUMAN;A8K070_HUMAN	GPS1
A0A096LP25_HUMAN	AAK1
A0A096LP69_HUMAN	CD99
A0A0A0MS29_HUMAN;H7C433_HUMAN	MFF
A0A0A0MSA7_HUMAN	EIF4G3
A0A0A0MTC1_HUMAN;A0A0A0MTR7_HUMAN	RNF213
GAL3A_HUMAN;GAL3B_HUMAN	GATD3A;GATD3B
A0A0C4DG89_HUMAN	DDX46
A0A0C4DGB9_HUMAN	PPA2
A0A0D9SER5_HUMAN;K7EN94_HUMAN	CDK11B;TARDBP
A0A0G2JJL1_HUMAN;A0A140T9L0_HUMAN	WDR46
A0A0G2JQT1_HUMAN;A0A0G2JR96_HUMAN	CYFIP1
A0A0U1RQE4_HUMAN	SH3D19
A0A0U1RQK7_HUMAN	EIF4G3
A0A140T913_HUMAN;A0A140T933_HUMAN;A0A140T955_HUMAN;A0A140T9I0_HUMAN;A0A140T9X5_HUMAN;A0A1W2PPQ2_HUMAN;A0A1W2PRT9_HUMAN	HLA-A
A0A140T953_HUMAN;A0A140TA13_HUMAN	HLA-B
A0A1B0GV68_HUMAN	FARP1
A0A1B0GVI3_HUMAN	KRT10
A0A1B0GVS8_HUMAN	KIF16B
A0A1B0GW05_HUMAN	DPY19L1
A0A1B0GWG0_HUMAN;A0A2R8Y6D0_HUMAN	EPB41
A0A1C7CYX9_HUMAN	DPYSL2
A0A2R8Y4X2_HUMAN;A0A2R8YD40_HUMAN;A0A2R8YFD8_HUMAN	CHD4
A0A2R8Y5A6_HUMAN;A0A2R8YDM9_HUMAN;A0A2R8YGV1_HUMAN	ATXN2
A0A2R8Y651_HUMAN	GIPC3
A0A2R8Y6J6_HUMAN;A0A590UJM0_HUMAN	SCN10A
A0A2R8Y8D9_HUMAN	PROSER3
FXO3B_HUMAN	FOXO3B
A0A3B3ISE1_HUMAN	C9orf153
A0A3B3ISF0_HUMAN;A0A3B3ISF8_HUMAN;A0A3B3IT29_HUMAN	LARP1B
A0A3F2YNW7_HUMAN	ARID1B
A0A494BZV2_HUMAN	MPRIP
A0A494BZX7_HUMAN;A0A499FIJ6_HUMAN;B0QY83_HUMAN	MRTFA
A0A494C0R8_HUMAN;I3L2B0_HUMAN	CLUH
A0A494C0Y9_HUMAN	FAM120A
A0A499FIZ0_HUMAN	WDR26
A0A590UJ96_HUMAN
A0A5F9ZI63_HUMAN	EED
RBM47_HUMAN	RBM47
IFT56_HUMAN	TTC26
UBA6_HUMAN	UBA6
ESYT2_HUMAN	ESYT2
SHOT1_HUMAN	SHTN1
TM223_HUMAN	TMEM223
RHG10_HUMAN	ARHGAP10
MEX3A_HUMAN	MEX3A
ILVBL_HUMAN	ILVBL
NDUF8_HUMAN	NDUFAF8
PKHG3_HUMAN	PLEKHG3
SPD2B_HUMAN	SH3PXD2B
MACD2_HUMAN	MACROD2
NBAS_HUMAN	NBAS
SYTC2_HUMAN	TARS3
F234B_HUMAN	FAM234B
TYW5_HUMAN	TYW5
DEND3_HUMAN	DENND3
T131L_HUMAN	TMEM131L
VWA8_HUMAN	VWA8
SBNO1_HUMAN	SBNO1
SBNO1_HUMAN	SBNO1
GTPBA_HUMAN	GTPBP10
WDR91_HUMAN	WDR91
SH321_HUMAN	SH3D21
VP37C_HUMAN	VPS37C
TM189_HUMAN	TMEM189
TPC13_HUMAN	TRAPPC13
CNOT1_HUMAN	CNOT1
BDP1_HUMAN	BDP1
PGP_HUMAN	PGP
CE051_HUMAN	C5orf51
RCCD1_HUMAN	RCCD1
ZN316_HUMAN	ZNF316
SMHD1_HUMAN	SMCHD1
CAST2_HUMAN	CASTOR2
RHG42_HUMAN	ARHGAP42
U119B_HUMAN	UNC119B
MET15_HUMAN	METTL15
CC85C_HUMAN	CCDC85C
SAC31_HUMAN	SAC3D1
RTL8C_HUMAN	RTL8C
ZSWM8_HUMAN	ZSWIM8
RHG32_HUMAN	ARHGAP32
P121C_HUMAN	POM121C
WASH1_HUMAN	WASHC1
YDJC_HUMAN	YDJC
P20L1_HUMAN	PHF20L1
RUXGL_HUMAN;RUXG_HUMAN	SNRPG;SNRPGP15
NUD19_HUMAN	NUDT19
A9IYQ1_HUMAN	PDS5B
MI4GD_HUMAN	MIF4GD
HACD1_HUMAN	HACD1
MYO9A_HUMAN	MYO9A
EIF3C_HUMAN;EIFCL_HUMAN	EIF3C;EIF3CL
GPHRA_HUMAN;GPHRB_HUMAN	GPR89A;GPR89B
C9J057_HUMAN	ASNS
C9J647_HUMAN;F2Z2I0_HUMAN;F2Z2W5_HUMAN;F8WF03_HUMAN	SMPD4
RAS4B_HUMAN;RASL2_HUMAN	RASA4;RASA4B
C9J7S4_HUMAN;C9JVL3_HUMAN	PLEKHG2
C9JFK9_HUMAN	BAG3
MCRI1_HUMAN	MCRIP1
D3DQV9_HUMAN;H0Y3P2_HUMAN;H0YCF8_HUMAN;H0YCH5_HUMAN;H0YD77_HUMAN;H0YD99_HUMAN;H0YDC0_HUMAN;H0YE87_HUMAN;H0YEC5_HUMAN;H0YEI7_HUMAN;H0YEN8_HUMAN	EIF4G2
D6RGZ7_HUMAN	TSPAN5
E5RK69_HUMAN	ANXA6
E7EM57_HUMAN;E7EUI8_HUMAN	G6PD
E7EV07_HUMAN	ARHGEF4
E7EVA0_HUMAN	MAP4
NACAM_HUMAN	NACA
E9PJN9_HUMAN	RPS3
E9PJR7_HUMAN	PKP3
E9PKG0_HUMAN	PLEC
E9PMS6_HUMAN;H0YDG6_HUMAN	LMO7
E9PN50_HUMAN;R4GNH3_HUMAN	PSMC3
NDUC2_HUMAN;NDUCR_HUMAN	NDUFC2;NDUFC2-KCTD14
E9PQR4_HUMAN	TUB
CK098_HUMAN	C11orf98
F5GZ99_HUMAN	KDM5A
F5H4F6_HUMAN	MARK2
G3V2E8_HUMAN;G3V2W4_HUMAN;G3V2X9_HUMAN;H9KV75_HUMAN	ACTN1
G5E972_HUMAN	TMPO
G5EA36_HUMAN;I3L328_HUMAN	CDC27
H0Y459_HUMAN	NCOR1
H0Y4H1_HUMAN	PTPRF
H0Y9Y2_HUMAN	BOD1L1
H0YAR2_HUMAN	PABPC1
H0YD48_HUMAN;H0YE97_HUMAN;H0YEF7_HUMAN;H0YEH1_HUMAN;H0YEY8_HUMAN	PICALM
H0YDF6_HUMAN	NHSL1
H0YG79_HUMAN	CCDC86
H0YJT2_HUMAN	STRN3
H0YL33_HUMAN	ANXA2
H3BRE6_HUMAN;J3KNZ9_HUMAN	FBRS
H7BZB3_HUMAN	CAD
H7BZJ3_HUMAN	PDIA3
H7C144_HUMAN	ACTN4
H7C3M7_HUMAN	FARP2
I3L3P7_HUMAN	RPS15A
J3KND1_HUMAN	SAAL1
J3KQL8_HUMAN	APOL2
J3KR51_HUMAN	ZNF525
J3KTN0_HUMAN	EIF4A1
K7EJH8_HUMAN	ACTN4
K7EM38_HUMAN	ACTG1
K7EM39_HUMAN	ARL5C
K7EPT8_HUMAN	GFAP
K7ER90_HUMAN	EIF3G
S35U4_HUMAN	SLC35A4
ASURF_HUMAN	ASDURF
MIDUO_HUMAN	MIEF1
M0QY01_HUMAN	EPS15L1
M0QYC1_HUMAN;M0QYS3_HUMAN;M0QZH8_HUMAN;M0QZR4_HUMAN	ARHGEF1
M0QYL7_HUMAN	HNRNPL
M0QZM1_HUMAN	HNRNPM
DNS2A_HUMAN	DNASE2
ADAS_HUMAN	AGPS
UBXN8_HUMAN	UBXN8
KIF2A_HUMAN	KIF2A
KITM_HUMAN	TK2
DX39A_HUMAN	DDX39A
PDLI1_HUMAN	PDLIM1
BACH_HUMAN	ACOT7
MYO1C_HUMAN	MYO1C
SNP23_HUMAN	SNAP23
HAX1_HUMAN	HAX1
EYA2_HUMAN	EYA2
AIP_HUMAN	AIP
GTPB1_HUMAN	GTPBP1
STXB3_HUMAN	STXBP3
AP4M1_HUMAN	AP4M1
SMAP_HUMAN	SMAP
RB27B_HUMAN	RAB27B
AP3B1_HUMAN	AP3B1
RHOD_HUMAN	RHOD
LEG8_HUMAN	LGALS8
NDUS8_HUMAN	NDUFS8
TR10A_HUMAN	TNFRSF10A
IKBE_HUMAN	NFKBIE
PSD11_HUMAN	PSMD11
PSD12_HUMAN	PSMD12
PSMD9_HUMAN	PSMD9
ATOX1_HUMAN	ATOX1
MEN1_HUMAN	MEN1
CBX4_HUMAN	CBX4
PGRC1_HUMAN	PGRMC1
SPT5H_HUMAN	SUPT5H
TAF4_HUMAN	TAF4
DFFA_HUMAN	DFFA
HIP1_HUMAN	HIP1
CLIC1_HUMAN	CLIC1
EIF3F_HUMAN	EIF3F
WWP2_HUMAN	WWP2
ODPX_HUMAN	PDHX
QSOX1_HUMAN	QSOX1
DCTN6_HUMAN	DCTN6
ACATN_HUMAN	SLC33A1
WASL_HUMAN	WASL
IPO5_HUMAN	IPO5
RPOM_HUMAN	POLRMT
EF2K_HUMAN	EEF2K
SAP18_HUMAN	SAP18
IF2B3_HUMAN	IGF2BP3
DNM1L_HUMAN	DNM1L
DNM1L_HUMAN	DNM1L
RTCA_HUMAN	RTCA
P3C2A_HUMAN	PIK3C2A
IFRD1_HUMAN	IFRD1
P85B_HUMAN	PIK3R2
GOLI4_HUMAN	GOLIM4
AGRIN_HUMAN	AGRN
PLOD2_HUMAN	PLOD2
MEIS1_HUMAN	MEIS1
EXOC5_HUMAN	EXOC5
ELL2_HUMAN	ELL2
BT3A1_HUMAN;BT3A2_HUMAN;BT3A3_HUMAN	BTN3A1;BTN3A2;BTN3A3
NDUA4_HUMAN	NDUFA4
PSDE_HUMAN	PSMD14
ZN593_HUMAN	ZNF593
BIN1_HUMAN	BIN1
IMA4_HUMAN	KPNA3
STK25_HUMAN	STK25
USP9Y_HUMAN	USP9Y
BCL9_HUMAN	BCL9
KRIT1_HUMAN	KRIT1
PESC_HUMAN	PES1
SDCB1_HUMAN	SDCBP
PITM1_HUMAN	PITPNM1
MPP10_HUMAN	MPHOSPH10
NOP56_HUMAN	NOP56
DDX3X_HUMAN	DDX3X
RNT2_HUMAN	RNASET2
PODXL_HUMAN	PODXL
CCN1_HUMAN	CCN1
PEX12_HUMAN	PEX12
PIR_HUMAN	PIR
IMA3_HUMAN	KPNA4
TRI38_HUMAN	TRIM38
NFIB_HUMAN	NFIB
E2F3_HUMAN	E2F3
PPP6_HUMAN	PPP6C
NDKM_HUMAN	NME4
P3C2B_HUMAN	PIK3C2B
MA2B1_HUMAN	MAN2B1
UBE2C_HUMAN	UBE2C
PDXK_HUMAN	PDXK
ACOD_HUMAN	SCD
PLPP3_HUMAN	PLPP3
ARI1A_HUMAN	ARID1A
NEMP1_HUMAN	NEMP1
TXND9_HUMAN	TXNDC9
SOCS6_HUMAN	SOCS6
TRAD1_HUMAN	TRAFD1
COX7R_HUMAN	COX7A2L
ACPM_HUMAN	NDUFAB1
UBFD1_HUMAN	UBFD1
CTRO_HUMAN	CIT
COPE_HUMAN	COPE
RFXK_HUMAN	RFXANK
BORG1_HUMAN	CDC42EP2
AP3D1_HUMAN	AP3D1
CCS_HUMAN	CCS
ZN195_HUMAN	ZNF195
ABLM1_HUMAN	ABLIM1
DVL1_HUMAN	DVL1
DVL2_HUMAN	DVL2
CHD1_HUMAN	CHD1
CHD2_HUMAN	CHD2
GOSR2_HUMAN	GOSR2
TOR1A_HUMAN	TOR1A
TOR1B_HUMAN	TOR1B
STX16_HUMAN	STX16
ADA10_HUMAN	ADAM10
ABCD4_HUMAN	ABCD4
PTGES_HUMAN	PTGES
KMT2D_HUMAN	KMT2D
ITBP1_HUMAN	ITGB1BP1
TRDMT_HUMAN	TRDMT1
APAF_HUMAN	APAF1
IMPA2_HUMAN	IMPA2
MP2K7_HUMAN	MAP2K7
ACOT8_HUMAN	ACOT8
CDIPT_HUMAN	CDIPT
PDCD5_HUMAN	PDCD5
ANM5_HUMAN	PRMT5
NHRF1_HUMAN	SLC9A3R1
CHK1_HUMAN	CHEK1
TR10B_HUMAN	TNFRSF10B
FPGT_HUMAN	FPGT
TPP1_HUMAN	TPP1
TCRG1_HUMAN	TCERG1
NDC80_HUMAN	NDC80
NRP1_HUMAN	NRP1
TNPO2_HUMAN	TNPO2
UN13B_HUMAN	UNC13B
RPC1_HUMAN	POLR3A
RASM_HUMAN	MRAS
PSA7_HUMAN	PSMA7
SCAM3_HUMAN	SCAMP3
OPLA_HUMAN	OPLAH
BCKD_HUMAN	BCKDK
IFIT3_HUMAN	IFIT3
MGST3_HUMAN	MGST3
GEMI2_HUMAN	GEMIN2
TX1B3_HUMAN	TAX1BP3
GIPC1_HUMAN	GIPC1
PCD17_HUMAN	PCDH17
IKKB_HUMAN	IKBKB
TI23B_HUMAN;TIM23_HUMAN	TIMM23;TIMM23B
HAT1_HUMAN	HAT1
CSKP_HUMAN	CASK
PLD2_HUMAN	PLD2
ML12A_HUMAN;ML12B_HUMAN	MYL12A;MYL12B
HGS_HUMAN	HGS
AURKA_HUMAN	AURKA
RAB7L_HUMAN	RAB29
CLGN_HUMAN	CLGN
MYPT1_HUMAN	PPP1R12A
GAK_HUMAN	GAK
HNRDL_HUMAN	HNRNPDL
HNRDL_HUMAN	HNRNPDL
XPO1_HUMAN	XPO1
BTAF1_HUMAN	BTAF1
ARHGA_HUMAN	ARHGEF10
ZN609_HUMAN	ZNF609
ZN646_HUMAN	ZNF646
PDZD2_HUMAN	PDZD2
SPTN2_HUMAN	SPTBN2
MAST4_HUMAN	MAST4
SC16A_HUMAN	SEC16A
PLXB2_HUMAN	PLXNB2
KHNYN_HUMAN	KHNYN
TCPR2_HUMAN	TECPR2
SR140_HUMAN	U2SURP
SET1A_HUMAN	SETD1A
N4BP3_HUMAN	N4BP3
SYNJ2_HUMAN	SYNJ2
SYNEM_HUMAN	SYNM
K0355_HUMAN	KIAA0355
KIF3B_HUMAN	KIF3B
PUR4_HUMAN	PFAS
DCLK1_HUMAN	DCLK1
CE290_HUMAN	CEP290
ANR28_HUMAN	ANKRD28
ARHGB_HUMAN	ARHGEF11
MRPP3_HUMAN	PRORP
IKKA_HUMAN	CHUK
NPC1_HUMAN	NPC1
PLCB_HUMAN	AGPAT2
DEGS1_HUMAN	DEGS1
SCAM1_HUMAN	SCAMP1
SCAM2_HUMAN	SCAMP2
ARC1B_HUMAN	ARPC1B
ARPC2_HUMAN	ARPC2
ARPC3_HUMAN	ARPC3
BET1_HUMAN	BET1
RPAC1_HUMAN	POLR1C
PLS1_HUMAN	PLSCR1
TIF1A_HUMAN	TRIM24
PGRC2_HUMAN	PGRMC2
CETN3_HUMAN	CETN3
PFD6_HUMAN	PFDN6
WDR46_HUMAN	WDR46
NKRF_HUMAN	NKRF
GNPAT_HUMAN	GNPAT
LAMA5_HUMAN	LAMA5
ZN185_HUMAN	ZNF185
CASC3_HUMAN	CASC3
RT12_HUMAN	MRPS12
OBRG_HUMAN	LEPROT
ACOX3_HUMAN	ACOX3
SURF4_HUMAN	SURF4
SPTC1_HUMAN	SPTLC1
SPTC2_HUMAN	SPTLC2
FANCG_HUMAN	FANCG
OGT1_HUMAN	OGT
SIVA_HUMAN	SIVA1
PMM2_HUMAN	PMM2
RPC7_HUMAN	POLR3G
TM9S1_HUMAN	TM9SF1
INP4B_HUMAN	INPP4B
TRI18_HUMAN	MID1
HMGB3_HUMAN	HMGB3
PPM1G_HUMAN	PPM1G
SHIP2_HUMAN	INPPL1
FANCA_HUMAN	FANCA
EIF3D_HUMAN	EIF3D
EIF3H_HUMAN	EIF3H
HDAC3_HUMAN	HDAC3
NVL_HUMAN	NVL
BCAT2_HUMAN	BCAT2
IPO8_HUMAN	IPO8
STX7_HUMAN	STX7
TNC18_HUMAN	TNRC18
MOT4_HUMAN	SLC16A3
MRP4_HUMAN	ABCC4
MRP5_HUMAN	ABCC5
RPA34_HUMAN	CD3EAP
P4HA2_HUMAN	P4HA2
YKT6_HUMAN	YKT6
INSI1_HUMAN	INSIG1
NUP42_HUMAN	NUP42
ARPC5_HUMAN	ARPC5
RPB4_HUMAN	POLR2D
MAFG_HUMAN	MAFG
OGG1_HUMAN	OGG1
PDPK1_HUMAN	PDPK1
TPSN_HUMAN	TAPBP
PER1_HUMAN	PER1
R113A_HUMAN	RNF113A
KCNN4_HUMAN	KCNN4
DHX15_HUMAN	DHX15
MCES_HUMAN	RNMT
ZZEF1_HUMAN	ZZEF1
TTI1_HUMAN	TTI1
RRP8_HUMAN	RRP8
SI1L1_HUMAN	SIPA1L1
CYB5B_HUMAN	CYB5B
PRP4_HUMAN	PRPF4
SERA_HUMAN	PHGDH
NDUS4_HUMAN	NDUFS4
IRAK2_HUMAN	IRAK2
PHF1_HUMAN	PHF1
DC1L2_HUMAN	DYNC1LI2
PSMD3_HUMAN	PSMD3
RFOX2_HUMAN	RBFOX2
PAPS1_HUMAN	PAPSS1
ZW10_HUMAN	ZW10
B4GT5_HUMAN	B4GALT5
SNUT1_HUMAN	SART1
GPAA1_HUMAN	GPAA1
DAPK3_HUMAN	DAPK3
TGFI1_HUMAN	TGFB1I1
ZBT43_HUMAN	ZBTB43
AP5Z1_HUMAN	AP5Z1
HS12A_HUMAN	HSPA12A
CP110_HUMAN	CCP110
ADCY6_HUMAN	ADCY6
CTIF_HUMAN	CTIF
VIP2_HUMAN	PPIP5K2
M3K7_HUMAN	MAP3K7
MCA3_HUMAN	EEF1E1
RIPK2_HUMAN	RIPK2
WDR62_HUMAN	WDR62
HNRPR_HUMAN	HNRNPR
HNRPR_HUMAN	HNRNPR
PRPF3_HUMAN	PRPF3
TXNL1_HUMAN	TXNL1
TPD54_HUMAN	TPD52L2
TPD54_HUMAN	TPD52L2
EMC8_HUMAN	EMC8
ERI3_HUMAN	ERI3
P52K_HUMAN	THAP12
SYNJ1_HUMAN	SYNJ1
FIBP_HUMAN	FIBP
IF4G3_HUMAN	EIF4G3
PPIH_HUMAN	PPIH
MBTP2_HUMAN	MBTPS2
SUV91_HUMAN	SUV39H1
HTRA2_HUMAN	HTRA2
ARK72_HUMAN	AKR7A2
E41L2_HUMAN	EPB41L2
E41L2_HUMAN	EPB41L2
TGON2_HUMAN	TGOLN2
RA51C_HUMAN	RAD51C
WIPF1_HUMAN	WIPF1
B2L11_HUMAN	BCL2L11
XRCC3_HUMAN	XRCC3
SGCE_HUMAN	SGCE
AKA10_HUMAN	AKAP10
DENR_HUMAN	DENR
XPOT_HUMAN	XPOT
DNPH1_HUMAN	DNPH1
TIM44_HUMAN	TIMM44
TPPC3_HUMAN	TRAPPC3
CHM2A_HUMAN	CHMP2A
NCK2_HUMAN	NCK2
TSN6_HUMAN	TSPAN6
PLRG1_HUMAN	PLRG1
PRC1_HUMAN	PRC1
RGS10_HUMAN	RGS10
ZN207_HUMAN	ZNF207
NDUB5_HUMAN	NDUFB5
NDUB3_HUMAN	NDUFB3
NDUA2_HUMAN	NDUFA2
ASNA_HUMAN	ASNA1
BUB1_HUMAN	BUB1
BUB3_HUMAN	BUB3
PLPP2_HUMAN	PLPP2
ACTN4_HUMAN	ACTN4
MAAI_HUMAN	GSTZ1
BUD23_HUMAN	BUD23
HTSF1_HUMAN	HTATSF1
ERD23_HUMAN	KDELR3
CIKS_HUMAN	TRAF3IP2
CYH3_HUMAN	CYTH3
AAKB2_HUMAN	PRKAB2
AP1G1_HUMAN	AP1G1
STX6_HUMAN	STX6
SNG1_HUMAN	SYNGR1
SNG2_HUMAN	SYNGR2
SGTA_HUMAN	SGTA
ENSA_HUMAN	ENSA
MCAT_HUMAN	SLC25A20
SYNC_HUMAN	NARS1
MYO1B_HUMAN	MYO1B
MYO1B_HUMAN	MYO1B
SSNA1_HUMAN	SSNA1
PM34_HUMAN	SLC25A17
CPSF5_HUMAN	NUDT21
LANC1_HUMAN	LANCL1
STRN_HUMAN	STRN
U3IP2_HUMAN	RRP9
SCO2_HUMAN	SCO2
CF410_HUMAN	CFAP410
AKAP8_HUMAN	AKAP8
GTPB6_HUMAN	GTPBP6
G6PT1_HUMAN	SLC37A4
IDH3B_HUMAN	IDH3B
NRDC_HUMAN	NRDC
CALU_HUMAN	CALU
CALU_HUMAN	CALU
EDIL3_HUMAN	EDIL3
SAHH2_HUMAN	AHCYL1
KIF1C_HUMAN	KIF1C
TLL1_HUMAN	TLL1
PRIC3_HUMAN	PRICKLE3
ORC5_HUMAN	ORC5
NDUS5_HUMAN	NDUFS5
ORC4_HUMAN	ORC4
PEX1_HUMAN	PEX1
RAD21_HUMAN	RAD21
DHX16_HUMAN	DHX16
3BP5_HUMAN	SH3BP5
MED14_HUMAN	MED14
PCDH7_HUMAN	PCDH7
KPRB_HUMAN	PRPSAP2
SMCA5_HUMAN	SMARCA5
ADCY3_HUMAN	ADCY3
JIP4_HUMAN	SPAG9
NPA1P_HUMAN	URB1
SI1L3_HUMAN	SIPA1L3
ZC3H1_HUMAN	ZFC3H1
TYW4_HUMAN	LCMT2
AQR_HUMAN	AQR
OPA1_HUMAN	OPA1
GANP_HUMAN	MCM3AP
PI51C_HUMAN	PIP5K1C
KIF1B_HUMAN	KIF1B
KDM1A_HUMAN	KDM1A
TBCD4_HUMAN	TBC1D4
PHLP1_HUMAN	PHLPP1
FADS1_HUMAN	FADS1
PEPL_HUMAN	PPL
GSDME_HUMAN	GSDME
EVI5_HUMAN	EVI5
NRP2_HUMAN	NRP2
MA1A2_HUMAN	MAN1A2
ACSL4_HUMAN	ACSL4
SNX3_HUMAN	SNX3
STX10_HUMAN	STX10
OGA_HUMAN	OGA
ADCY9_HUMAN	ADCY9
VINEX_HUMAN	SORBS3
HNRPQ_HUMAN	SYNCRIP
PRP17_HUMAN	CDC40
B4GT4_HUMAN	B4GALT4
RNBP6_HUMAN	RANBP6
NEMF_HUMAN	NEMF
GMDS_HUMAN	GMDS
NMT2_HUMAN	NMT2
CCNT1_HUMAN	CCNT1
BUB1B_HUMAN	BUB1B
PLOD3_HUMAN	PLOD3
IF4E2_HUMAN	EIF4E2
CCNT2_HUMAN	CCNT2
DIAP1_HUMAN	DIAPH1
SEP15_HUMAN	SELENOF
EXOC3_HUMAN	EXOC3
PDE8A_HUMAN	PDE8A
PLIN3_HUMAN	PLIN3
MOT2_HUMAN	SLC16A7
RAD1_HUMAN	RAD1
MAFK_HUMAN	MAFK
ANM3_HUMAN	PRMT3
PEX10_HUMAN	PEX10
IMA7_HUMAN	KPNA6
UGDH_HUMAN	UGDH
CTND1_HUMAN	CTNND1
SNX2_HUMAN	SNX2
DPM1_HUMAN	DPM1
USO1_HUMAN	USO1
RT14_HUMAN	MRPS14
TOM1_HUMAN	TOM1
H2B1K_HUMAN	H2BC12
F262_HUMAN	PFKFB2
CCD22_HUMAN	CCDC22
PQBP1_HUMAN	PQBP1
PRAF2_HUMAN	PRAF2
DKC1_HUMAN	DKC1
IF2P_HUMAN	EIF5B
EDF1_HUMAN	EDF1
KIN17_HUMAN	KIN
DIAP2_HUMAN	DIAPH2
DNJA2_HUMAN	DNAJA2
BRD4_HUMAN	BRD4
CUTA_HUMAN	CUTA
TBL1X_HUMAN	TBL1X
HUS1_HUMAN	HUS1
PFD1_HUMAN	PFDN1
RNH1_HUMAN	RNASEH1
NBN_HUMAN	NBN
NOL3_HUMAN	NOL3
MCE1_HUMAN	RNGTT
ABCB7_HUMAN	ABCB7
MITF_HUMAN	MITF
SRGP2_HUMAN	SRGAP2
CAPON_HUMAN	NOS1AP
IGSF3_HUMAN	IGSF3
XYLK_HUMAN	FAM20B
WDR1_HUMAN	WDR1
ATP9A_HUMAN	ATP9A
N4BP1_HUMAN	N4BP1
ROCK2_HUMAN	ROCK2
CLAP2_HUMAN	CLASP2
CLAP2_HUMAN	CLASP2
PTCD1_HUMAN	PTCD1
COBL_HUMAN	COBL
CPNE3_HUMAN	CPNE3
ZBED4_HUMAN	ZBED4
ATG13_HUMAN	ATG13
HIP1R_HUMAN	HIP1R
OBSL1_HUMAN	OBSL1
BRE1B_HUMAN	RNF40
PHF2_HUMAN	PHF2
ZC11A_HUMAN	ZC3H11A
CLU_HUMAN	CLUH
CAND2_HUMAN	CAND2
KDM4A_HUMAN	KDM4A
DJC13_HUMAN	DNAJC13
PP6R2_HUMAN	PPP6R2
CNOT3_HUMAN	CNOT3
ANR17_HUMAN	ANKRD17
SIN3B_HUMAN	SIN3B
DNJB6_HUMAN	DNAJB6
LRP5_HUMAN	LRP5
COQ9_HUMAN	COQ9
GGCT_HUMAN	GGCT
NDUS7_HUMAN	NDUFS7
RTN2_HUMAN	RTN2
NDUS2_HUMAN	NDUFS2
ZPR1_HUMAN	ZPR1
DUS11_HUMAN	DUSP11
NIPS2_HUMAN	NIPSNAP2
HMMR_HUMAN	HMMR
PDCD6_HUMAN	PDCD6
TBCA_HUMAN	TBCA
VATG1_HUMAN	ATP6V1G1
VPS4B_HUMAN	VPS4B
MPU1_HUMAN	MPDU1
ZN217_HUMAN	ZNF217
TP4A3_HUMAN	PTP4A3
H2AY_HUMAN	MACROH2A1
SH3L1_HUMAN	SH3BGRL
FLNB_HUMAN	FLNB
NCOR1_HUMAN	NCOR1
VAMP4_HUMAN	VAMP4
NDUS6_HUMAN	NDUFS6
PEX14_HUMAN	PEX14
TRIM3_HUMAN	TRIM3
ULK1_HUMAN	ULK1
CISY_HUMAN	CS
SPAG7_HUMAN	SPAG7
RM33_HUMAN	MRPL33
SC22B_HUMAN	SEC22B
PR40A_HUMAN	PRPF40A
TACC1_HUMAN	TACC1
NDK6_HUMAN	NME6
CDC45_HUMAN	CDC45
GGYF1_HUMAN	GIGYF1
LRCH4_HUMAN	LRCH4
MTX2_HUMAN	MTX2
VP26A_HUMAN	VPS26A
NDUB1_HUMAN	NDUFB1
MPPB_HUMAN	PMPCB
TECTA_HUMAN	TECTA
MED24_HUMAN	MED24
KTNA1_HUMAN	KATNA1
E2F6_HUMAN	E2F6
CRLF1_HUMAN	CRLF1
Z324A_HUMAN	ZNF324
PSIP1_HUMAN	PSIP1
ERLN1_HUMAN	ERLIN1
TAD2A_HUMAN	TADA2A
SUPT3_HUMAN	SUPT3H
GPC4_HUMAN	GPC4
NDUS3_HUMAN	NDUFS3
SRS10_HUMAN	SRSF10
GEMI_HUMAN	GMNN
CLN5_HUMAN	CLN5
ECI2_HUMAN	ECI2
TADA3_HUMAN	TADA3
TAF5L_HUMAN	TAF5L
EED_HUMAN	EED
BAF_HUMAN	BANF1
SF3B1_HUMAN	SF3B1
CSDE1_HUMAN	CSDE1
WBP4_HUMAN	WBP4
PRKRA_HUMAN	PRKRA
RPC9_HUMAN	CRCP
LRP6_HUMAN	LRP6
KS6A5_HUMAN	RPS6KA5
MED6_HUMAN	MED6
MYCB2_HUMAN	MYCBP2
KBL_HUMAN	GCAT
NPM3_HUMAN	NPM3
LYPA1_HUMAN	LYPLA1
ERAL1_HUMAN	ERAL1
CREG1_HUMAN	CREG1
SPB7_HUMAN	SERPINB7
U520_HUMAN	SNRNP200
MTU1_HUMAN	TRMU
TIPRL_HUMAN	TIPRL
OFD1_HUMAN	OFD1
TM1L1_HUMAN	TOM1L1
KS6A4_HUMAN	RPS6KA4
SURF6_HUMAN	SURF6
PPM1B_HUMAN	PPM1B
UTP20_HUMAN	UTP20
NU155_HUMAN	NUP155
XRP2_HUMAN	RP2
WDHD1_HUMAN	WDHD1
CRTAP_HUMAN	CRTAP
CMC1_HUMAN	SLC25A12
RA51D_HUMAN	RAD51D
PALM_HUMAN	PALM
RENR_HUMAN	ATP6AP2
RNH2A_HUMAN	RNASEH2A
CD123_HUMAN	CDC123
CAN15_HUMAN	CAPN15
BCAR3_HUMAN	BCAR3
POP7_HUMAN	POP7
EIF3G_HUMAN	EIF3G
EIF3J_HUMAN	EIF3J
CBR3_HUMAN	CBR3
PSD10_HUMAN	PSMD10
AP1G2_HUMAN	AP1G2
FACE1_HUMAN	ZMPSTE24
IDHC_HUMAN	IDH1
GATB_HUMAN	GATB
SCO1_HUMAN	SCO1
ATRN_HUMAN	ATRN
RBBP9_HUMAN	RBBP9
STAM2_HUMAN	STAM2
DGAT1_HUMAN	DGAT1
PRAF3_HUMAN	ARL6IP5
PIAS1_HUMAN	PIAS1
PIAS2_HUMAN	PIAS2
SPF27_HUMAN	BCAS2
DCTN3_HUMAN	DCTN3
DNJC8_HUMAN	DNAJC8
SPF30_HUMAN	SMNDC1
RAD17_HUMAN	RAD17
ATP5H_HUMAN	ATP5PD
TSN9_HUMAN	TSPAN9
FLOT1_HUMAN	FLOT1
TRIO_HUMAN	TRIO
ATP5L_HUMAN	ATP5MG
MPDZ_HUMAN	MPDZ
CBPD_HUMAN	CPD
GLRX3_HUMAN	GLRX3
RL1D1_HUMAN	RSL1D1
WFS1_HUMAN	WFS1
CLPX_HUMAN	CLPX
S14L2_HUMAN	SEC14L2
SYUG_HUMAN	SNCG
CIAO1_HUMAN	CIAO1
DFFB_HUMAN	DFFB
ZFAN5_HUMAN	ZFAND5
RGS20_HUMAN	RGS20
S22A5_HUMAN	SLC22A5
SRP72_HUMAN	SRP72
JTB_HUMAN	JTB
DXO_HUMAN	DXO
DDAH1_HUMAN	DDAH1
RECQ4_HUMAN	RECQL4
RECQ5_HUMAN	RECQL5
RMP_HUMAN	URI1
B3GA3_HUMAN	B3GAT3
ST17B_HUMAN	STK17B
MTA2_HUMAN	MTA2
UBP1_HUMAN	USP1
STK10_HUMAN	STK10
KPCD3_HUMAN	PRKD3
GFPT2_HUMAN	GFPT2
LTN1_HUMAN	LTN1
TOM70_HUMAN	TOMM70
IPO13_HUMAN	IPO13
DDHD2_HUMAN	DDHD2
TOX4_HUMAN	TOX4
MICA2_HUMAN	MICAL2
SC24D_HUMAN	SEC24D
UFL1_HUMAN	UFL1
SRBS2_HUMAN	SORBS2
PHF14_HUMAN	PHF14
PHF14_HUMAN	PHF14
SASH1_HUMAN	SASH1
CSCL1_HUMAN	TMEM63A
FARP2_HUMAN	FARP2
UBXN7_HUMAN	UBXN7
TOX_HUMAN	TOX
SUN1_HUMAN	SUN1
PLPHP_HUMAN	PLPBP
ERLN2_HUMAN	ERLIN2
PRP6_HUMAN	PRPF6
PCF11_HUMAN	PCF11
FRYL_HUMAN	FRYL
NFAT5_HUMAN	NFAT5
ENDD1_HUMAN	ENDOD1
GLCE_HUMAN	GLCE
GLSK_HUMAN	GLS
HAUS5_HUMAN	HAUS5
FBX21_HUMAN	FBXO21
KDM4B_HUMAN	KDM4B
SOGA1_HUMAN	SOGA1
UBP19_HUMAN	USP19
WDR47_HUMAN	WDR47
AP2A2_HUMAN	AP2A2
SC31A_HUMAN	SEC31A
SC31A_HUMAN	SEC31A
CSTN1_HUMAN	CLSTN1
CE152_HUMAN	CEP152
SLIK5_HUMAN	SLITRK5
HEXI1_HUMAN	HEXIM1
RPP14_HUMAN	RPP14
CCNB2_HUMAN	CCNB2
YIF1A_HUMAN	YIF1A
UBR5_HUMAN	UBR5
AGFG2_HUMAN	AGFG2
PRS23_HUMAN	PRSS23
SCAF4_HUMAN	SCAF4
NDUB6_HUMAN	NDUFB6
MFN2_HUMAN	MFN2
DUS14_HUMAN	DUSP14
SPN1_HUMAN	SNUPN
UBE4B_HUMAN	UBE4B
ZFPL1_HUMAN	ZFPL1
ELP1_HUMAN	ELP1
UBL3_HUMAN	UBL3
NDUA3_HUMAN	NDUFA3
NDUB4_HUMAN	NDUFB4
NDUB8_HUMAN	NDUFB8
SCEL_HUMAN	SCEL
NDUA7_HUMAN	NDUFA7
RTN3_HUMAN	RTN3
LETM1_HUMAN	LETM1
EPN2_HUMAN	EPN2
STBD1_HUMAN	STBD1
ZRAB2_HUMAN	ZRANB2
SNX4_HUMAN	SNX4
ZWINT_HUMAN	ZWINT
LC7L3_HUMAN	LUC7L3
KI20A_HUMAN	KIF20A
KIF4A_HUMAN	KIF4A
MBD4_HUMAN	MBD4
MTMR5_HUMAN	SBF1
GOSR1_HUMAN	GOSR1
KAT7_HUMAN	KAT7
UCP5_HUMAN	SLC25A14
ATE1_HUMAN	ATE1
PDE8B_HUMAN	PDE8B
VAPB_HUMAN	VAPB
SNAPN_HUMAN	SNAPIN
MPZL1_HUMAN	MPZL1
MPZL1_HUMAN	MPZL1
NDUAA_HUMAN	NDUFA10
FKBP9_HUMAN	FKBP9
6PGL_HUMAN	PGLS
PAPS2_HUMAN	PAPSS2
SMC2_HUMAN	SMC2
ATG7_HUMAN	ATG7
TACC2_HUMAN	TACC2
TRI16_HUMAN	TRIM16
SYFM_HUMAN	FARS2
ZBT7A_HUMAN	ZBTB7A
LYPA2_HUMAN	LYPLA2
IPO7_HUMAN	IPO7
ARI2_HUMAN	ARIH2
M3K6_HUMAN	MAP3K6
SLU7_HUMAN	SLU7
AGM1_HUMAN	PGM3
MOCS3_HUMAN	MOCS3
CD2B2_HUMAN	CD2BP2
SVIL_HUMAN	SVIL
BAG4_HUMAN	BAG4
AHSA1_HUMAN	AHSA1
PARN_HUMAN	PARN
PSMG1_HUMAN	PSMG1
FMNL1_HUMAN	FMNL1
SGPL1_HUMAN	SGPL1
CLD7_HUMAN	CLDN7
CNEP1_HUMAN	CTDNEP1
NSA2_HUMAN	NSA2
G6PE_HUMAN	H6PD
SC24A_HUMAN	SEC24A
SC24B_HUMAN	SEC24B
GTR10_HUMAN	SLC2A10
NADK_HUMAN	NADK
TYDP2_HUMAN	TDP2
SFT2B_HUMAN	SFT2D2
MPC2_HUMAN	MPC2
MET18_HUMAN	METTL18
ETHE1_HUMAN	ETHE1
ACSL3_HUMAN	ACSL3
RPA1_HUMAN	POLR1A
PCNT_HUMAN	PCNT
YETS4_HUMAN	YEATS4
ZBT11_HUMAN	ZBTB11
CNOT4_HUMAN	CNOT4
STABP_HUMAN	STAMBP
ASML_HUMAN	ASMTL
ECEL1_HUMAN	ECEL1
CDS2_HUMAN	CDS2
EYA4_HUMAN	EYA4
FR1OP_HUMAN	FGFR1OP
PPR3D_HUMAN	PPP1R3D
BRD1_HUMAN	BRD1
RPP29_HUMAN	POP4
HERC2_HUMAN	HERC2
RAB3D_HUMAN	RAB3D
SNP29_HUMAN	SNAP29
OXSR1_HUMAN	OXSR1
GGPPS_HUMAN	GGPS1
HS74L_HUMAN	HSPA4L
PTBP3_HUMAN	PTBP3
STR3N_HUMAN	STARD3NL
LSM8_HUMAN	LSM8
AP2A1_HUMAN	AP2A1
WIZ_HUMAN	WIZ
DDX58_HUMAN	DDX58
STAU1_HUMAN	STAU1
TTC4_HUMAN	TTC4
BAG2_HUMAN	BAG2
BAG3_HUMAN	BAG3
M4K4_HUMAN	MAP4K4
QORL1_HUMAN	CRYZL1
AIFM1_HUMAN	AIFM1
CLIC3_HUMAN	CLIC3
EMAL2_HUMAN	EML2
LATS1_HUMAN	LATS1
BPNT1_HUMAN	BPNT1
DDAH2_HUMAN	DDAH2
ABHGA_HUMAN	ABHD16A
GPAN1_HUMAN	GPANK1
TXD12_HUMAN	TXNDC12
TRUB2_HUMAN	TRUB2
ECD_HUMAN	ECD
SYF2_HUMAN	SYF2
MBD3_HUMAN	MBD3
TOP3B_HUMAN	TOP3B
NUDT3_HUMAN	NUDT3
PTTG1_HUMAN	PTTG1
BCL10_HUMAN	BCL10
NDUBA_HUMAN	NDUFB10
CLPT1_HUMAN	CLPTM1
ZBED1_HUMAN	ZBED1
MOC2B_HUMAN	MOCS2
TOM40_HUMAN	TOMM40
PX11B_HUMAN	PEX11B
PAK4_HUMAN	PAK4
CHK2_HUMAN	CHEK2
APBA3_HUMAN	APBA3
ACL6A_HUMAN	ACTL6A
CCNE2_HUMAN	CCNE2
NSD2_HUMAN	NSD2
CYB5_HUMAN	CYB5A
LDHA_HUMAN	LDHA
DHE3_HUMAN	GLUD1
DYR_HUMAN	DHFR
NB5R3_HUMAN	CYB5R3
GSHR_HUMAN	GSR
COX2_HUMAN	MT-CO2
COX3_HUMAN	MT-CO3
SODC_HUMAN	SOD1
PNPH_HUMAN	PNP
HPRT_HUMAN	HPRT1
AATM_HUMAN	GOT2
ABL1_HUMAN	ABL1
EGFR_HUMAN	EGFR
PGK1_HUMAN	PGK1
KAD1_HUMAN	AK1
ADA_HUMAN	ADA
ATP6_HUMAN	MT-ATP6
CAH2_HUMAN	CA2
ASSY_HUMAN	ASS1
A2MG_HUMAN	A2M
CO3_HUMAN	C3
TIMP1_HUMAN	TIMP1
MYC_HUMAN	MYC
RASN_HUMAN	NRAS
RASH_HUMAN	HRAS
RASK_HUMAN	KRAS
LDLR_HUMAN	LDLR
TGFB1_HUMAN	TGFB1
HLAB_HUMAN	HLA-B
HLAH_HUMAN	HLA-H
CO1A1_HUMAN	COL1A1
CO3A1_HUMAN	COL3A1
CO4A1_HUMAN	COL4A1
K1C14_HUMAN	KRT14
K2C6A_HUMAN	KRT6A
LMNA_HUMAN	LMNA
LMNA_HUMAN	LMNA
FINC_HUMAN	FN1
FETUA_HUMAN	AHSG
ALBU_HUMAN	ALB
TFR1_HUMAN	TFRC
TRFL_HUMAN	LTF
FRIH_HUMAN	FTH1
NU1M_HUMAN	MT-ND1
NU2M_HUMAN	MT-ND2
ATP8_HUMAN	MT-ATP8
VTNC_HUMAN	VTN
CATA_HUMAN	CAT
RAF1_HUMAN	RAF1
GLCM_HUMAN	GBA
FUCO_HUMAN	FUCA1
ALDOA_HUMAN	ALDOA
CYTB_HUMAN	CSTB
ANXA1_HUMAN	ANXA1
APOB_HUMAN	APOB
GCR_HUMAN	NR3C1
SODM_HUMAN	SOD2
OAT_HUMAN	OAT
KITH_HUMAN	TK1
K2C1_HUMAN	KRT1
TBB4A_HUMAN	TUBB4A
G3P_HUMAN	GAPDH
ARLY_HUMAN	ASL
HLAA_HUMAN	HLA-A
ERBB2_HUMAN	ERBB2
CPNS1_HUMAN	CAPNS1
HSPB1_HUMAN	HSPB1
TYSY_HUMAN	TYMS
RPN1_HUMAN	RPN1
RPN2_HUMAN	RPN2
GNAI2_HUMAN	GNAI2
H2A1B_HUMAN;H2A1C_HUMAN;H2A3_HUMAN	H2AC4;HIST1H2AC;HIST3H2A
B3A2_HUMAN	SLC4A2
AT1A1_HUMAN	ATP1A1
AT1B1_HUMAN	ATP1B1
A4_HUMAN	APP
ALDH2_HUMAN	ALDH2
HMGN1_HUMAN	HMGN1
ADT2_HUMAN	SLC25A5
ISG15_HUMAN	ISG15
PCCA_HUMAN	PCCA
PCCB_HUMAN	PCCB
PPB1_HUMAN	ALPP
IF2A_HUMAN	EIF2S1
ICAM1_HUMAN	ICAM1
RLA1_HUMAN	RPLP1
RLA2_HUMAN	RPLP2
RLA0_HUMAN	RPLP0
FABPH_HUMAN	FABP3
RPC4_HUMAN	POLR3D
LA_HUMAN	SSB
ITB1_HUMAN	ITGB1
K1C18_HUMAN	KRT18
K2C8_HUMAN	KRT8
DCUP_HUMAN	UROD
CHLE_HUMAN	BCHE
AGAL_HUMAN	GLA
GELS_HUMAN	GSN
RB_HUMAN	RB1
PTMA_HUMAN	PTMA
CDK1_HUMAN	CDK1
ATPB_HUMAN	ATP5F1B
S10A6_HUMAN	S100A6
IF4E_HUMAN	EIF4E
ENOA_HUMAN	ENO1
ENOA_HUMAN	ENO1
FCER2_HUMAN	FCER2
PYGL_HUMAN	PYGL
G6PI_HUMAN	GPI
DPOLB_HUMAN	POLB
NPM_HUMAN	NPM1
TPM3_HUMAN	TPM3
ITAV_HUMAN	ITGAV
LIPL_HUMAN	LPL
HEXA_HUMAN	HEXA
GDN_HUMAN	SERPINE2
HYEP_HUMAN	EPHX1
ACBP_HUMAN	DBI
LDHB_HUMAN	LDHB
CENPB_HUMAN	CENPB
GPX1_HUMAN	GPX1
PDIA1_HUMAN	P4HB
ACYP1_HUMAN	ACYP1
CATD_HUMAN	CTSD
ANXA2_HUMAN	ANXA2
CAN1_HUMAN	CAPN1
TBB5_HUMAN	TUBB
SAP_HUMAN	PSAP
HEXB_HUMAN	HEXB
PROF1_HUMAN	PFN1
PMGE_HUMAN	BPGM
APT_HUMAN	APRT
SYEP_HUMAN	EPRS1
CATB_HUMAN	CTSB
HS90A_HUMAN	HSP90AA1
GALT_HUMAN	GALT
HNRPC_HUMAN	HNRNPC
QCR6_HUMAN	UQCRH
LAMB1_HUMAN	LAMB1
YES_HUMAN	YES1
LYN_HUMAN	LYN
TPM2_HUMAN	TPM2
FUMH_HUMAN	FH
ERCC1_HUMAN	ERCC1
TSP1_HUMAN	THBS1
ZFX_HUMAN;ZFY_HUMAN	ZFX;ZFY
IGF1R_HUMAN	IGF1R
ANXA6_HUMAN	ANXA6
DAF_HUMAN	CD55
MDR1_HUMAN	ABCB1
4F2_HUMAN	SLC3A2
4F2_HUMAN	SLC3A2
BGLR_HUMAN	GUSB
PFKAM_HUMAN	PFKM
HS90B_HUMAN	HSP90AB1
SRPRA_HUMAN	SRPRA
ASNS_HUMAN	ASNS
HEM3_HUMAN	HMBS
ODPA_HUMAN	PDHA1
CO4A2_HUMAN	COL4A2
CY1_HUMAN	CYC1
RU2B_HUMAN	SNRPB2
MET_HUMAN	MET
MYL3_HUMAN	MYL3
RU17_HUMAN	SNRNP70
ITA5_HUMAN	ITGA5
NFIC_HUMAN	NFIC
VIME_HUMAN	VIM
RS17_HUMAN	RPS17
K1C19_HUMAN	KRT19
K2C7_HUMAN	KRT7
GNAI3_HUMAN	GNAI3
ANXA5_HUMAN	ANXA5
K1C16_HUMAN	KRT16
STS_HUMAN	STS
RSSA_HUMAN	RPSA
CD63_HUMAN	CD63
RM03_HUMAN	MRPL3
SNRPA_HUMAN	SNRPA
FGF2_HUMAN	FGF2
ENOG_HUMAN	ENO2
THIK_HUMAN	ACAA1
SRP19_HUMAN	SRP19
GSTP1_HUMAN	GSTP1
RU1C_HUMAN	SNRPC
LEG1_HUMAN	LGALS1
DHPR_HUMAN	QDPR
HMGB1_HUMAN	HMGB1
GNAO_HUMAN	GNAO1
GSTM1_HUMAN	GSTM1
TPM1_HUMAN	TPM1
TPM1_HUMAN	TPM1
TPM1_HUMAN	TPM1
CLCA_HUMAN	CLTA
CLCB_HUMAN	CLTB
ANXA4_HUMAN	ANXA4
CN37_HUMAN	CNP
HMOX1_HUMAN	HMOX1
DLDH_HUMAN	DLD
HXB7_HUMAN	HOXB7
ROA1_HUMAN	HNRNPA1
RU2A_HUMAN	SNRPA1
COX6C_HUMAN	COX6C
TACD2_HUMAN	TACSTD2
PARP1_HUMAN	PARP1
DPOLA_HUMAN	POLA1
IFIT2_HUMAN	IFIT2
IFIT1_HUMAN	IFIT1
FURIN_HUMAN	FURIN
LKHA4_HUMAN	LTA4H
ALDOC_HUMAN	ALDOC
H2AV_HUMAN;H2AZ_HUMAN	H2AFV;H2AZ1
TFPT_HUMAN	TFPT
ATX1L_HUMAN	ATXN1L
ZN688_HUMAN	ZNF688
GRL1A_HUMAN	POLR2M
DERPC_HUMAN	DERPC
GST2_HUMAN;GSTT2_HUMAN	GSTT2;GSTT2B
POTEI_HUMAN	POTEI
ZN865_HUMAN	ZNF865
ZN888_HUMAN	ZNF888
S352B_HUMAN	SLC35E2B
TPC2A_HUMAN;TPC2B_HUMAN	TRAPPC2;TRAPPC2B
NARR_HUMAN	RAB34
RGPD1_HUMAN;RGPD2_HUMAN	RGPD1;RGPD2
ST1A4_HUMAN	SULT1A4
HS71A_HUMAN;HS71B_HUMAN	HSPA1A;HSPA1B
U2AF1_HUMAN;U2AF5_HUMAN	U2AF1;U2AF1L5
CBSL_HUMAN;CBS_HUMAN	CBS;CBSL
CALM1_HUMAN;CALM2_HUMAN;CALM3_HUMAN	CALM1;CALM2;CALM3
RPAC2_HUMAN	POLR1D
GLI2_HUMAN	GLI2
GLI3_HUMAN	GLI3
RO60_HUMAN	RO60
LYAG_HUMAN	GAA
RRAS_HUMAN	RRAS
ARAF_HUMAN	ARAF
H14_HUMAN	H1-4
ODP2_HUMAN	DLAT
PTPRF_HUMAN	PTPRF
NR2F6_HUMAN	NR2F6
COT1_HUMAN	NR2F1
THIO_HUMAN	TXN
COX5B_HUMAN	COX5B
PPGB_HUMAN	CTSA
MGST1_HUMAN	MGST1
TAU_HUMAN	MAPT
KAP0_HUMAN	PRKAR1A
TFPI1_HUMAN	TFPI
HEM4_HUMAN	UROS
ESTD_HUMAN	ESD
CH60_HUMAN	HSPD1
CLUS_HUMAN	CLU
BIP_HUMAN	HSPA5
LAMC1_HUMAN	LAMC1
PPAL_HUMAN	ACP2
MTAP2_HUMAN	MAP2
HSP7C_HUMAN	HSPA8
GTR1_HUMAN	SLC2A1
GTR3_HUMAN	SLC2A3
41_HUMAN	EPB41
UMPS_HUMAN	UMPS
ODPB_HUMAN	PDHB
ODB2_HUMAN	DBT
PYGB_HUMAN	PYGB
RALA_HUMAN	RALA
BCR_HUMAN	BCR
LAMP1_HUMAN	LAMP1
ACADM_HUMAN	ACADM
FGFR1_HUMAN	FGFR1
TOP1_HUMAN	TOP1
TOP2A_HUMAN	TOP2A
G6PD_HUMAN	G6PD
UBL4A_HUMAN	UBL4A
VDR_HUMAN	VDR
ERR1_HUMAN	ESRRA
PYC_HUMAN	PC
DMD_HUMAN	DMD
C1TC_HUMAN	MTHFD1
MPRI_HUMAN	IGF2R
ADHX_HUMAN	ADH5
CDK4_HUMAN	CDK4
SRF_HUMAN	SRF
PRPS2_HUMAN	PRPS2
PABP1_HUMAN	PABPC1
PCNA_HUMAN	PCNA
HARS1_HUMAN	HARS1
ADT1_HUMAN	SLC25A4
ADT3_HUMAN	SLC25A6
FA5_HUMAN	F5
IMDH2_HUMAN	IMPDH2
TPR_HUMAN	TPR
KCRB_HUMAN	CKB
ANXA3_HUMAN	ANXA3
ODBA_HUMAN	BCKDHA
ACTN1_HUMAN	ACTN1
ACE_HUMAN	ACE
SRC_HUMAN	SRC
PEPD_HUMAN	PEPD
XRCC6_HUMAN	XRCC6
XRCC5_HUMAN	XRCC5
UNG_HUMAN	UNG
NR2C1_HUMAN	NR2C1
COX41_HUMAN	COX4I1
HEM1_HUMAN	ALAS1
GILT_HUMAN	IFI30
RINI_HUMAN	RNH1
BMP1_HUMAN	BMP1
CY24A_HUMAN	CYBA
EF2_HUMAN	EEF2
K1C10_HUMAN	KRT10
K1C13_HUMAN	KRT13
K2C5_HUMAN	KRT5
PDIA4_HUMAN	PDIA4
P4HA1_HUMAN	P4HA1
TCTP_HUMAN	TPT1
HEM2_HUMAN	ALAD
PLST_HUMAN	PLS3
ACPH_HUMAN	APEH
ETFA_HUMAN	ETFA
GYS1_HUMAN	GYS1
KAP2_HUMAN	PRKAR2A
ANXA8_HUMAN	ANXA8
ENOB_HUMAN	ENO3
T2FB_HUMAN	GTF2F2
CD59_HUMAN	CD59
MTDC_HUMAN	MTHFD2
MIF_HUMAN	MIF
CD99_HUMAN	CD99
GLU2B_HUMAN	PRKCSH
FPPS_HUMAN	FDPS
TRI27_HUMAN	TRIM27
CBPM_HUMAN	CPM
CX7A2_HUMAN	COX7A2
NID1_HUMAN	NID1
AK1A1_HUMAN	AKR1A1
KPYM_HUMAN	PKM
KPYM_HUMAN	PKM
ACYP2_HUMAN	ACYP2
ENPL_HUMAN	HSP90B1
CCNB1_HUMAN	CCNB1
MYL6B_HUMAN	MYL6B
RSMB_HUMAN	SNRPB
IDE_HUMAN	IDE
PO2F1_HUMAN	POU2F1
HNRPL_HUMAN	HNRNPL
SYDC_HUMAN	DARS1
PLAK_HUMAN	JUP
QCR7_HUMAN	UQCRB
ETS2_HUMAN	ETS2
GLNA_HUMAN	GLUL
ALDR_HUMAN	AKR1B1
AMPN_HUMAN	ANPEP
PVR_HUMAN	PVR
ERF3A_HUMAN	GSPT1
ARSA_HUMAN	ARSA
B4GT1_HUMAN	B4GALT1
EZRI_HUMAN	EZR
ATF2_HUMAN	ATF2
UCHL3_HUMAN	UCHL3
FOSL2_HUMAN	FOSL2
MCP_HUMAN	CD46
NQO1_HUMAN	NQO1
GNS_HUMAN	GNS
PHKG2_HUMAN	PHKG2
ZEP1_HUMAN	HIVEP1
ARSB_HUMAN	ARSB
RS2_HUMAN	RPS2
TFE2_HUMAN	TCF3
DESP_HUMAN	DSP
RFA2_HUMAN	RPA2
MUC1_HUMAN	MUC1
COX7C_HUMAN	COX7C
TIMP2_HUMAN	TIMP2
ANPRA_HUMAN	NPR1
CD44_HUMAN	CD44
NQO2_HUMAN	NQO2
ITB4_HUMAN	ITGB4
CBR1_HUMAN	CBR1
ACADS_HUMAN	ACADS
CREB1_HUMAN	CREB1
BGAL_HUMAN	GLB1
PP2BB_HUMAN	PPP3CB
NCK1_HUMAN	NCK1
GCFC2_HUMAN	GCFC2
H15_HUMAN	H1-5
H12_HUMAN	H1-2
NCPR_HUMAN	POR
MGMT_HUMAN	MGMT
FER_HUMAN	FER
AT2A2_HUMAN	ATP2A2
CBPE_HUMAN	CPE
PLCG2_HUMAN	PLCG2
FAAA_HUMAN	FAH
STMN1_HUMAN	STMN1
YBOX3_HUMAN	YBX3
YBOX3_HUMAN	YBX3
ZNF14_HUMAN	ZNF14
ZNF16_HUMAN	ZNF16
ZNF24_HUMAN	ZNF24
ZKSC1_HUMAN	ZKSCAN1
ZNF3_HUMAN	ZNF3
NAGAB_HUMAN	NAGA
HMGA1_HUMAN	HMGA1
HMGA1_HUMAN	HMGA1
ZNF8_HUMAN	ZNF8
TMM11_HUMAN	TMEM11
AATC_HUMAN	GOT1
KPCA_HUMAN	PRKCA
JUNB_HUMAN	JUNB
ITA2_HUMAN	ITGA2
ASM_HUMAN	SMPD1
UBF1_HUMAN	UBTF
JUND_HUMAN	JUND
ATF7_HUMAN	ATF7
NDUB7_HUMAN	NDUFB7
KAPCA_HUMAN	PRKACA
CAN2_HUMAN	CAPN2
CEBPB_HUMAN	CEBPB
NEUM_HUMAN	GAP43
PTN2_HUMAN	PTPN2
PYRG1_HUMAN	CTPS1
EGLN_HUMAN	ENG
DDX5_HUMAN	DDX5
PFKAL_HUMAN	PFKL
LEG3_HUMAN	LGALS3
PRS6A_HUMAN	PSMC3
TCPA_HUMAN	TCP1
PTN1_HUMAN	PTPN1
ERCC2_HUMAN	ERCC2
RL35A_HUMAN	RPL35A
ITB5_HUMAN	ITGB5
ARF4_HUMAN	ARF4
RL7_HUMAN	RPL7
VINC_HUMAN	VCL
PTPRA_HUMAN	PTPRA
ARY1_HUMAN	NAT1
SON_HUMAN	SON
SON_HUMAN	SON
NELFE_HUMAN	NELFE
RL17_HUMAN	RPL17
PGAM1_HUMAN	PGAM1
RCC1_HUMAN	RCC1
SDC1_HUMAN	SDC1
ATF6A_HUMAN	ATF6
DNLI1_HUMAN	LIG1
ATP5J_HUMAN	ATP5PF
XRCC1_HUMAN	XRCC1
K1C15_HUMAN	KRT15
CADH2_HUMAN	CDH2
PLCG1_HUMAN	PLCG1
LFA3_HUMAN	CD58
NUCL_HUMAN	NCL
HXK1_HUMAN	HK1
RPB3_HUMAN	POLR2C
RPAB1_HUMAN	POLR2E
NDUV2_HUMAN	NDUFV2
ELK1_HUMAN	ELK1
TNR1A_HUMAN	TNFRSF1A
GGT1_HUMAN	GGT1
ERCC3_HUMAN	ERCC3
RO52_HUMAN	TRIM21
TFEB_HUMAN	TFEB
E2AK2_HUMAN	EIF2AK2
SPEE_HUMAN	SRM
CSK22_HUMAN	CSNK2A2
RXRA_HUMAN	RXRA
ITIH2_HUMAN	ITIH2
NFKB1_HUMAN	NFKB1
TYPH_HUMAN	TYMP
AT2B1_HUMAN	ATP2B1
IF2B_HUMAN	EIF2S2
ANXA7_HUMAN	ANXA7
TBP_HUMAN	TBP
CCNA2_HUMAN	CCNA2
BTF3_HUMAN	BTF3
RAB4A_HUMAN	RAB4A
RAB5A_HUMAN	RAB5A
RAB6A_HUMAN	RAB6A
MSH3_HUMAN	MSH3
PSB1_HUMAN	PSMB1
MPRD_HUMAN	M6PR
COX5A_HUMAN	COX5A
LMNB1_HUMAN	LMNB1
BCL3_HUMAN	BCL3
ICAL_HUMAN	CAST
IMDH1_HUMAN	IMPDH1
CO9A1_HUMAN	COL9A1
CO5A1_HUMAN	COL5A1
RASA1_HUMAN	RASA1
PTMS_HUMAN	PTMS
CD11B_HUMAN	CDK11B
GSTM3_HUMAN	GSTM3
VATB2_HUMAN	ATP6V1B2
VATC1_HUMAN	ATP6V1C1
CSRP1_HUMAN	CSRP1
FLNA_HUMAN	FLNA
NF1_HUMAN	NF1
AOFA_HUMAN	MAOA
ACOC_HUMAN	ACO1
SCF_HUMAN	KITLG
5NTD_HUMAN	NT5E
TAF1_HUMAN	TAF1
TA2R_HUMAN	TBXA2R
VDAC1_HUMAN	VDAC1
SDHB_HUMAN	SDHB
CD9_HUMAN	CD9
ODBB_HUMAN	BCKDHB
COMT_HUMAN	COMT
TGM2_HUMAN	TGM2
MUTA_HUMAN	MMUT
OSBP1_HUMAN	OSBP
PIMT_HUMAN	PCMT1
FBRL_HUMAN	FBL
PUR2_HUMAN	GART
PUR6_HUMAN	PAICS
NLTP_HUMAN	SCP2
UBA1_HUMAN	UBA1
NDKB_HUMAN	NME2
ENPP1_HUMAN	ENPP1
USF1_HUMAN	USF1
ADRO_HUMAN	FDXR
ROA2_HUMAN	HNRNPA2B1
RFX1_HUMAN	RFX1
CBL_HUMAN	CBL
KAPCB_HUMAN	PRKACB
QCR2_HUMAN	UQCRC2
HEMH_HUMAN	FECH
FBLN1_HUMAN	FBLN1
TCEA1_HUMAN	TCEA1
ITA6_HUMAN	ITGA6
SFPQ_HUMAN	SFPQ
TBG1_HUMAN	TUBG1
PPIB_HUMAN	PPIB
MAOM_HUMAN	ME2
SYWC_HUMAN	WARS1
RS3_HUMAN	RPS3
GCSH_HUMAN	GCSH
KS6B1_HUMAN	RPS6KB1
PTPRE_HUMAN	PTPRE
SP100_HUMAN	SP100
CRCM_HUMAN	MCC
NFYA_HUMAN	NFYA
SAHH_HUMAN	AHCY
COF1_HUMAN	CFL1
IF4B_HUMAN	EIF4B
HAP40_HUMAN	F8A1
AT2B4_HUMAN	ATP2B4
IP3KA_HUMAN	ITPKA
DGKA_HUMAN	DGKA
CPT2_HUMAN	CPT2
KTHY_HUMAN	DTYMK
RIR1_HUMAN	RRM1
LAMA2_HUMAN	LAMA2
RAE1_HUMAN	CHM
COT2_HUMAN	NR2F2
EF1B_HUMAN	EEF1B2
AT5F1_HUMAN	ATP5PB
PPAC_HUMAN	ACP1
THIL_HUMAN	ACAT1
TENA_HUMAN	TNC
MYL9_HUMAN	MYL9
CCNE1_HUMAN	CCNE1
RPB1_HUMAN	POLR2A
CDK2_HUMAN	CDK2
APC_HUMAN	APC
ARBK1_HUMAN	GRK2
MCM3_HUMAN	MCM3
NFYB_HUMAN	NFYB
THTM_HUMAN	MPST
RS12_HUMAN	RPS12
BRD2_HUMAN	BRD2
TNR6_HUMAN	FAS
TYY1_HUMAN	YY1
DNJB1_HUMAN	DNAJB1
DNJB2_HUMAN	DNAJB2
ATPA_HUMAN	ATP5F1A
PSA1_HUMAN	PSMA1
PSA2_HUMAN	PSMA2
PSA3_HUMAN	PSMA3
PSA4_HUMAN	PSMA4
ITA3_HUMAN	ITGA3
MOES_HUMAN	MSN
DDX6_HUMAN	DDX6
CTNA2_HUMAN	CTNNA2
DNMT1_HUMAN	DNMT1
U2AF2_HUMAN	U2AF2
RL13_HUMAN	RPL13
RAE2_HUMAN	CHML
IVD_HUMAN	IVD
S10A4_HUMAN	S100A4
MGAT1_HUMAN	MGAT1
HMGB2_HUMAN	HMGB2
PTBP1_HUMAN	PTBP1
SYTC_HUMAN	TARS1
SYVC_HUMAN	VARS1
EF1G_HUMAN	EEF1G
FKBP2_HUMAN	FKBP2
STOM_HUMAN	STOM
KAD4_HUMAN	AK4
1433T_HUMAN	YWHAQ
MK03_HUMAN	MAPK3
MARK3_HUMAN	MARK3
ARNT_HUMAN	ARNT
RL10_HUMAN	RPL10
CO8A1_HUMAN	COL8A1
RFA1_HUMAN	RPA1
APEX1_HUMAN	APEX1
CD82_HUMAN	CD82
DCK_HUMAN	DCK
PYR1_HUMAN	CAD
CALR_HUMAN	CALR
MAP4_HUMAN	MAP4
MAP4_HUMAN	MAP4
CALX_HUMAN	CANX
P85A_HUMAN	PIK3R1
PSB8_HUMAN	PSMB8
PSA5_HUMAN	PSMA5
PSB4_HUMAN	PSMB4
PSB6_HUMAN	PSMB6
PSB5_HUMAN	PSMB5
ABCD3_HUMAN	ABCD3
ITPI2_HUMAN	ITPRID2
NDUS1_HUMAN	NDUFS1
DPOD1_HUMAN	POLD1
TEAD1_HUMAN	TEAD1
HXD9_HUMAN	HOXD9
SMCA1_HUMAN	SMARCA1
MK01_HUMAN	MAPK1
GRAN_HUMAN	GCA
RXRB_HUMAN	RXRB
ERCC5_HUMAN	ERCC5
AMPL_HUMAN	LAP3
S10A2_HUMAN	S100A2
T2EA_HUMAN	GTF2E1
T2EB_HUMAN	GTF2E2
TPP2_HUMAN	TPP2
IMPA1_HUMAN	IMPA1
EPHA2_HUMAN	EPHA2
EPHB2_HUMAN	EPHB2
SHC1_HUMAN	SHC1
3MG_HUMAN	MPG
RABP2_HUMAN	CRABP2
KDM5A_HUMAN	KDM5A
TKT_HUMAN	TKT
NOS3_HUMAN	NOS3
SPB3_HUMAN	SERPINB3
PML_HUMAN	PML
PML_HUMAN	PML
TYK2_HUMAN	TYK2
EF1D_HUMAN	EEF1D
MARCS_HUMAN	MARCKS
GNA11_HUMAN	GNA11
AL4A1_HUMAN	ALDH4A1
ERP29_HUMAN	ERP29
PRDX6_HUMAN	PRDX6
BLVRB_HUMAN	BLVRB
PRDX5_HUMAN	PRDX5
DOPD_HUMAN	DDT
GFRP_HUMAN	GCHFR
PRDX3_HUMAN	PRDX3
ATPD_HUMAN	ATP5F1D
RL12_HUMAN	RPL12
ECHM_HUMAN	ECHS1
KCY_HUMAN	CMPK1
PEBP1_HUMAN	PEBP1
PDIA3_HUMAN	PDIA3
2AAA_HUMAN	PPP2R1A
2AAB_HUMAN	PPP2R1B
CDC27_HUMAN	CDC27
CCND3_HUMAN	CCND3
WEE1_HUMAN	WEE1
MPIP2_HUMAN	CDC25B
MPIP3_HUMAN	CDC25C
PPIF_HUMAN	PPIF
NKTR_HUMAN	NKTR
NMT1_HUMAN	NMT1
HMOX2_HUMAN	HMOX2
PURA2_HUMAN	ADSS2
UFO_HUMAN	AXL
AMRP_HUMAN	LRPAP1
PUR8_HUMAN	ADSL
CLIP1_HUMAN	CLIP1
SORCN_HUMAN	SRI
GSTT1_HUMAN	GSTT1
ILEU_HUMAN	SERPINB1
SL7A1_HUMAN	SLC7A1
AL1B1_HUMAN	ALDH1B1
AL3A1_HUMAN	ALDH3A1
RPB2_HUMAN	POLR2B
SDHA_HUMAN	SDHA
COR1A_HUMAN	CORO1A
GDIA_HUMAN	GDI1
METK2_HUMAN	MAT2A
KAP1_HUMAN	PRKAR1B
CPSM_HUMAN	CPS1
RIR2_HUMAN	RRM2
SDC4_HUMAN	SDC4
TIA1_HUMAN	TIA1
SC6A6_HUMAN	SLC6A6
DNJA1_HUMAN	DNAJA1
AKT1_HUMAN	AKT1
AKT2_HUMAN	AKT2
QCR1_HUMAN	UQCRC1
3HIDH_HUMAN	HIBADH
PUR9_HUMAN	ATIC
HNRH3_HUMAN	HNRNPH3
HNRH1_HUMAN	HNRNPH1
1433B_HUMAN	YWHAB
1433S_HUMAN	SFN
STIP1_HUMAN	STIP1
S10AB_HUMAN	S100A11
L1CAM_HUMAN	L1CAM
PRDX2_HUMAN	PRDX2
ARRB2_HUMAN	ARRB2
GLPK3_HUMAN;GLPK_HUMAN	GK;GK3P
DCTD_HUMAN	DCTD
P5CR1_HUMAN	PYCR1
GBP1_HUMAN	GBP1
GBP2_HUMAN	GBP2
ELF1_HUMAN	ELF1
HPPD_HUMAN	HPD
TF2H1_HUMAN	GTF2H1
STX2_HUMAN	STX2
CGL_HUMAN	CTH
RL9_HUMAN	RPL9
KINH_HUMAN	KIF5B
CSTF2_HUMAN	CSTF2
DUT_HUMAN	DUT
DUT_HUMAN	DUT
MRP1_HUMAN	ABCC1
CKS2_HUMAN	CKS2
S10A3_HUMAN	S100A3
ABCD1_HUMAN	ABCD1
MA1A1_HUMAN	MAN1A1
TTK_HUMAN	TTK
MCM4_HUMAN	MCM4
MCM5_HUMAN	MCM5
MCM7_HUMAN	MCM7
GALNS_HUMAN	GALNS
SDC2_HUMAN	SDC2
GLYC_HUMAN	SHMT1
GLYM_HUMAN	SHMT2
HSP74_HUMAN	HSPA4
GRK5_HUMAN	GRK5
MPI_HUMAN	MPI
GPC1_HUMAN	GPC1
PROF2_HUMAN	PFN2
CTNA1_HUMAN	CTNNA1
CTNB1_HUMAN	CTNNB1
BMI1_HUMAN	BMI1
PHB_HUMAN	PHB
SPB6_HUMAN	SERPINB6
MERL_HUMAN	NF2
RADI_HUMAN	RDX
RFA3_HUMAN	RPA3
RFC4_HUMAN	RFC4
RFC2_HUMAN	RFC2
RFC1_HUMAN	RFC1
RL22_HUMAN	RPL22
T2FA_HUMAN	GTF2F1
SPRE_HUMAN	SPR
PGH2_HUMAN	PTGS2
IDUA_HUMAN	IDUA
K1C9_HUMAN	KRT9
FBN1_HUMAN	FBN1
IRS1_HUMAN	IRS1
GDE_HUMAN	AGL
MYH9_HUMAN	MYH9
MYH10_HUMAN	MYH10
COPB2_HUMAN	COPB2
SOAT1_HUMAN	SOAT1
ADDA_HUMAN	ADD1
BASI_HUMAN	BSG
FUS_HUMAN	FUS
NU214_HUMAN	NUP214
DEK_HUMAN	DEK
GLRX1_HUMAN	GLRX
CHKA_HUMAN	CHKA
PPM1A_HUMAN	PPM1A
AHR_HUMAN	AHR
K22E_HUMAN	KRT2
HMGCL_HUMAN	HMGCL
PRS7_HUMAN	PSMC2
LEF1_HUMAN;TCF7_HUMAN;TF7L2_HUMAN	LEF1;TCF7;TCF7L2
ARL2_HUMAN	ARL2
ARL3_HUMAN	ARL3
MP2K2_HUMAN	MAP2K2
ATPG_HUMAN	ATP5F1C
VATE1_HUMAN	ATP6V1E1
HEM6_HUMAN	CPOX
RL4_HUMAN	RPL4
8ODP_HUMAN	NUDT1
LONM_HUMAN	LONP1
PGM1_HUMAN	PGM1
PP1G_HUMAN	PPP1CC
TGFR1_HUMAN	TGFBR1
GNL1_HUMAN	GNL1
SPB5_HUMAN	SERPINB5
RPB9_HUMAN	POLR2I
ODO2_HUMAN	DLST
GPX4_HUMAN	GPX4
SRP14_HUMAN	SRP14
NUP62_HUMAN	NUP62
HPCL1_HUMAN	HPCAL1
FDFT_HUMAN	FDFT1
TAGL2_HUMAN	TAGLN2
TALDO_HUMAN	TALDO1
SYUA_HUMAN	SNCA
ETFB_HUMAN	ETFB
RBMX_HUMAN	RBMX
BRCA1_HUMAN	BRCA1
COIL_HUMAN	COIL
VKGC_HUMAN	GGCX
LICH_HUMAN	LIPA
VATA_HUMAN	ATP6V1A
GRP75_HUMAN	HSPA9
IF4A3_HUMAN	EIF4A3
SMBP2_HUMAN	IGHMBP2
CDN1A_HUMAN	CDKN1A
RS19_HUMAN	RPS19
RL3_HUMAN	RPL3
COIA1_HUMAN	COL18A1
OST48_HUMAN	DDOST
AN32A_HUMAN	ANP32A
FEN1_HUMAN	FEN1
CUX1_HUMAN	CUX1
CAPG_HUMAN	CAPG
CAP2_HUMAN	CAP2
TXLNA_HUMAN	TXLNA
TCPZ_HUMAN	CCT6A
NNMT_HUMAN	NNMT
VHL_HUMAN	VHL
PBX1_HUMAN	PBX1
PBX2_HUMAN	PBX2
RL13A_HUMAN	RPL13A
ARL1_HUMAN	ARL1
MLH1_HUMAN	MLH1
STAT3_HUMAN	STAT3
STAT3_HUMAN	STAT3
UBP8_HUMAN	USP8
PEX19_HUMAN	PEX19
MDHC_HUMAN	MDH1
MDHM_HUMAN	MDH2
RFC5_HUMAN	RFC5
RFC3_HUMAN	RFC3
ECHA_HUMAN	HADHA
IF2G_HUMAN	EIF2S3
CETN2_HUMAN	CETN2
ETV6_HUMAN	ETV6
EIF2D_HUMAN	EIF2D
WNT5A_HUMAN	WNT5A
BUD31_HUMAN	BUD31
NAA10_HUMAN	NAA10
KDM5C_HUMAN	KDM5C
IPP2B_HUMAN;IPP2_HUMAN	PPP1R2;PPP1R2B
CSK_HUMAN	CSK
PLPL4_HUMAN	PNPLA4
GARS_HUMAN	GARS1
SYIC_HUMAN	IARS1
S19A1_HUMAN	SLC19A1
EIF1_HUMAN	EIF1
KPCI_HUMAN	PRKCI
ACTY_HUMAN	ACTR1B
ECI1_HUMAN	ECI1
LAP2A_HUMAN	TMPO
LAP2B_HUMAN	TMPO
STAT1_HUMAN	STAT1
STAT6_HUMAN	STAT6
MTREX_HUMAN	MTREX
AK1C3_HUMAN	AKR1C3
PK3CA_HUMAN	PIK3CA
PK3CB_HUMAN	PIK3CB
MTOR_HUMAN	MTOR
PI4KA_HUMAN	PI4KA
EPS15_HUMAN	EPS15
CASP3_HUMAN	CASP3
CASP2_HUMAN	CASP2
RS27_HUMAN	RPS27
ABL2_HUMAN	ABL2
HELZ_HUMAN	HELZ
CNDD3_HUMAN	NCAPD3
RBM34_HUMAN	RBM34
LPPRC_HUMAN	LRPPRC
THIM_HUMAN	ACAA2
RL35_HUMAN	RPL35
CDN2A_HUMAN	CDKN2A
PCP_HUMAN	PRCP
HD_HUMAN	HTT
ECE1_HUMAN	ECE1
MTHR_HUMAN	MTHFR
SATT_HUMAN	SLC1A4
LIS1_HUMAN	PAFAH1B1
MUC18_HUMAN	MCAM
CACP_HUMAN	CRAT
MATR3_HUMAN	MATR3
MSH2_HUMAN	MSH2
GPDM_HUMAN	GPD2
SSRA_HUMAN	SSR1
AL3B1_HUMAN	ALDH3B1
MAGA4_HUMAN	MAGEA4
PTN9_HUMAN	PTPN9
RANG_HUMAN	RANBP1
NAMPT_HUMAN	NAMPT
PRS6B_HUMAN	PSMC4
EFTS_HUMAN	TSFM
PPIC_HUMAN	PPIC
VDAC2_HUMAN	VDAC2
ACDSB_HUMAN	ACADSB
CBX5_HUMAN	CBX5
UBP5_HUMAN	USP5
MK08_HUMAN	MAPK8
MP2K4_HUMAN	MAP2K4
KI67_HUMAN	MKI67
KI67_HUMAN	MKI67
KPB2_HUMAN	PHKA2
KPB1_HUMAN	PHKA1
RAGP1_HUMAN	RANGAP1
RECQ1_HUMAN	RECQL
NOP2_HUMAN	NOP2
ATRX_HUMAN	ATRX
CRK_HUMAN	CRK
CRKL_HUMAN	CRKL
IF2M_HUMAN	MTIF2
BAG6_HUMAN	BAG6
NSF_HUMAN	NSF
MP2K3_HUMAN	MAP2K3
BRCC3_HUMAN	BRCC3
RL27A_HUMAN	RPL27A
RL5_HUMAN	RPL5
RL21_HUMAN	RPL21
RL28_HUMAN	RPL28
RS9_HUMAN	RPS9
RS5_HUMAN	RPS5
RS10_HUMAN	RPS10
MAP1B_HUMAN	MAP1B
GNPI1_HUMAN	GNPDA1
NEDD4_HUMAN	NEDD4
YAP1_HUMAN	YAP1
UTRO_HUMAN	UTRN
IQGA1_HUMAN	IQGAP1
STT3A_HUMAN	STT3A
MSS4_HUMAN	RABIF
PA24A_HUMAN	PLA2G4A
RPGP1_HUMAN	RAP1GAP
CAZA2_HUMAN	CAPZA2
CAPZB_HUMAN	CAPZB
IF1AX_HUMAN	EIF1AX
SYQ_HUMAN	QARS1
RL29_HUMAN	RPL29
UCRI_HUMAN	UQCRFS1
ATPO_HUMAN	ATP5PO
LIMS1_HUMAN	LIMS1
SC6A9_HUMAN	SLC6A9
PPCE_HUMAN	PREP
MAOX_HUMAN	ME1
IREB2_HUMAN	IREB2
RFX3_HUMAN	RFX3
RFX5_HUMAN	RFX5
PI42A_HUMAN	PIP4K2A
SOX9_HUMAN	SOX9
COPD_HUMAN	ARCN1
ERG7_HUMAN	LSS
PP2BC_HUMAN	PPP3CC
GSH1_HUMAN	GCLC
GSH0_HUMAN	GCLM
PCP4_HUMAN	PCP4
TPC10_HUMAN	TRAPPC10
PSMD8_HUMAN	PSMD8
SPB4_HUMAN	SERPINB4
PRC2A_HUMAN	PRRC2A
GSHB_HUMAN	GSS
TCPE_HUMAN	CCT5
PTSS1_HUMAN	PTDSS1
NEST_HUMAN	NES
HSP13_HUMAN	HSPA13
KC1A_HUMAN	CSNK1A1
KC1D_HUMAN	CSNK1D
IDHP_HUMAN	IDH2
PIPNB_HUMAN	PITPNB
CD97_HUMAN	CD97
DPOD2_HUMAN	POLD2
MRP_HUMAN	MARCKSL1
PAXI_HUMAN	PXN
CAMLG_HUMAN	CAMLG
NR2C2_HUMAN	NR2C2
MAPK2_HUMAN	MAPKAPK2
AL9A1_HUMAN	ALDH9A1
RL34_HUMAN	RPL34
RPIA_HUMAN	RPIA
LMAN1_HUMAN	LMAN1
NASP_HUMAN	NASP
FAS_HUMAN	FASN
FNTA_HUMAN	FNTA
FNTB_HUMAN	FNTB
DHYS_HUMAN	DHPS
TCPG_HUMAN	CCT3
RM19_HUMAN	MRPL19
ARRB1_HUMAN	ARRB1
EFTU_HUMAN	TUFM
AL7A1_HUMAN	ALDH7A1
UB2R1_HUMAN	CDC34
INPP_HUMAN	INPP1
CENPF_HUMAN	CENPF
SRP09_HUMAN	SRP9
UBE2A_HUMAN	UBE2A
PCY1A_HUMAN	PCYT1A
SYAC_HUMAN	AARS1
SYCC_HUMAN	CARS1
SYHM_HUMAN	HARS2
SYSC_HUMAN	SARS1
PPM1F_HUMAN	PPM1F
PRI1_HUMAN	PRIM1
PRI2_HUMAN	PRIM2
KC1E_HUMAN	CSNK1E
CTCF_HUMAN	CTCF
PSB3_HUMAN	PSMB3
PSB2_HUMAN	PSMB2
MCM2_HUMAN	MCM2
ACADV_HUMAN	ACADVL
YLPM1_HUMAN	YLPM1
VPS41_HUMAN	VPS41
TMEDA_HUMAN	TMED10
[truncated: 5,188 more rows]

## Sheet: up-regulated 0.5uM DBCO-Thal
RDX
ANXA6
PTGS2
HMOX1
STXBP1
AGRN

## Sheet: down-regulated 0.5uM DBCO-Thal
MBOAT2
SAFB2
NUP214
UNG
TPX2
ITGB4
SEMA3C
GATAD2A
DCBLD2
FBXO22
DERPC
OGT

## Sheet: up-regulated 5 uM DBCO-Thal
CDKN1C
COG7
IGBP1
UCK2
NUSAP1
KPNA2
GNL3L
CDT1
RBIS
ETS2
MORF4L2
RND3
TXNIP
MCM10
CD63
AMOTL2
WDR6
GART
TNPO2
CAPZA1
RDX
EXOC4
DLGAP5
HMGCS1
MTRR
CDC6
ORC1
STXBP1
HMOX1
TBCE
PDCL
HK1
SRXN1
NDRG3
OLFM1
NMD3
PTGS2
PFKP
ANXA6
USP11
EIF4A1

## Sheet: down-regulated 5 uM DBCO-Thal
RPRD2
RAVER1
BCAM
AURKB
SMARCD1
RABEP1
CDC42EP3
TRIM47
AIDA
BARD1
PPFIBP1
HSPG2
CPOX
SEMA3A
SEMA3C
ATF7
FBXO22
GATAD2A
DERPC
NUP210
CRTC3
WDR55
NAB1
TPX2
TFAP4
NOL9
NIPBL
PRR11
ZNF417;ZNF587
FAM83H
ZFR
ZNF281
COX19
SRFBP1
TOB1
MICU2
NDUFS1
GLRX5
NDUFB3
MICU1
NR2C2
SESN2
QSER1
ZMYM4
AXL
SDC1
PROCR
JUNB
COL4A2
COL12A1
DDX54
ZNF791
WIZ
PATZ1
CCDC71L
UTP20
SLITRK5
ZNF148
BUB1B
RNF169
CCNA2
TAF7
COL3A1
ABLIM1
SDC4
GGA2
RRM2
ITPRID2
MCM3AP
EXO1
ATAD2
NUP88
PCDH7
NUP54
ZCRB1
AKAP2
AURKA
CDC42EP2
PTPRS
ZNF143
FAM83D
CDC42EP1
THAP3
CEBPB
COL5A1
DCAF13
FN1
CDK5RAP2
FAM133A;FAM133B
NUP214
PPP1R9B
ENDOG
NCOR2
VASN
PTPRF
NSA2
POLR2A
CTNND1
GATAD2B
LEMD3
QKI
ITGB4
KLF5
HAX1
ATF6B
HCFC1
WNT5A
CENPF
PTPRF

## Sheet: up-regulated 20 uM DBCO-Thal
HDHD3
BCL2L2
NHLRC2
LUM
TRIM28
HDAC7
SEC24B
GSS
ZNF638
SMG5
ANTXR1
ATP13A1
RBM47
PTGS2
ZBTB21
CRLF3
HTRA3
TBCE
ERCC6L
FNBP1
NPEPPS
SQSTM1
NEDD1
LMTK2
STXBP1
BTAF1
HMOX1
USP11
PDCL
HIKESHI
ANKRD52
GYS1
SEC24D
MAP2K1
HK1
NTPCR
G6PD
ARHGEF1
HTATIP2
PFKP
EIF4A1
TUBB4A
ANXA6
PRRC2C
TBCA
CRLF1
YKT6
APP
RAB18
NSFL1C
CAPZA1
PGM3
RAB7A
MTDH
CHORDC1
SLC25A11
PSMD5
SACM1L
OTULIN
RBIS
PCOLCE
FBLN1
ETS2
CCN1
F5
SYAP1
WBP2
USP19
VTN
KPNA2
GART
UBA1
CDC34
CAVIN1
DYNC1I2
CYB5R3
CKAP4
RETSAT
CABIN1
NUSAP1
DBNL
VPS33A
STUB1
DOCK1
RPL13
GNAI3
ITIH3
KIDINS220
SCCPDH
FKBP2
LMAN2
MAP2K4
ALDH7A1
PRPSAP1
TRIM47
REEP5
BAG3
PKM
GNL3L
TIMP2
WDR6
KDM8
POLR3D
SNRPB
TMED1
HSPB1
CDKN2A
KIF13A
CLIP1
CLTC
ESD
HSPH1
CANX
NES
MTRR
DLGAP5
PPID
ANXA3
HMGCS1
DPYSL3
C12orf10
CD63
ARHGAP1
ROR2
PFAS
PSMD3
BAG3
MVB12A
ATP6V1A
MLKL
ARL8B
CCT8
PCMT1
NME2
OSGEP
EPPK1
LRPAP1
GALK1
PXDN
ACLY
STIP1
PGK1
PDIA3
PRDX6
ANXA8L1
VCP
PSMD14
OGG1
ARF1
ATP5F1A
PKM
CLU
HSPA8
OTUD6B
TSTA3

## Sheet: down-regulated 20 uM DBCO-Thal
SGCE
UPF3A
CDC20
ZNF317
LRP11
RUFY3
XPO7
GOLGA2
CENPH
WDR47
SPART
LTV1
ANLN
KBTBD2
CCDC88A
SMG8
TARS2
KDM4A
MT-ATP6
PANK1
C2CD5
SEPHS1
ARF6
NUMA1
EMC1
NKAPD1
CSDE1
SPG21
PRKAB2
MAP4
PIP4K2A
ZFP91
SFN
SRFBP1
THAP3
MYC
RNF2
NECTIN3
OGT
FBXO22
LPL
CDH2
DNMT1
KHNYN
RNMT
SEMA3A
BPTF
TNS4
SMOC1
C19orf53
SEMA3C
ATF7
ZSCAN29
GATAD2A
DCBLD2
CNOT4
DERPC
KIF18A
GPX1
VKORC1
RNF138
CRNKL1
PIK3C3
SYNPO
ZNF195
KRT19
ESF1
CDC42EP3
BCAM
RAVER1
DHX33
SMC3
HELLS
BARD1
RABEP1
CDK11B
JAG1
SLC5A6
CDK19
ZNF16
GRPEL2
NUCB1
ELF2
GCC1
DDX52
FADS1
DDA1
TRIP11
NT5DC2
AGRN
SYNM
JUND
SLC49A4
TOB1
TEX264
KDM3B
KIF11
PKN2
ASH1L
PPAN
YBX3
DHX57
CCDC12
EIF3E
SZRD1
PUM2
PATZ1
NDUFV2
PTP4A1
SELENOS
MICU2
NDUFB3
ELP2
LYPLAL1
TUFT1
NCAPH
WIPF2
FAM136A
FBXO9
PARP2
PTTG1
MICU1
BUD31
DIS3L
COX19
AKAP8L
NTHL1
MELK
TAF7
COL3A1
SDAD1
TBXA2R
BUB1B
UNG
COA7
CXorf56
SMNDC1
LACTB
TRIP12
RND3
APOBEC3B
CMC2
SOCS6
STAT3
NDUFA4
CGGBP1
CCND3
TTK
PHF3
LEF1;TCF7;TCF7L2
POLA1
JUNB
FNDC3B
ZFR
ZNF281
SPEN
ISCA1
WIZ
UTP20
FOXC1
SRCAP
SMC1A
DDX54
WDR46
GPATCH4
SON
NFIA
PPL
DDX56
NRG1
CAMSAP2
HOXB7
CDT1
THOC6
CDCA5
LEMD3
TPD52L2
SMAD2
SAP130
CDC40
ACVR1
TENT2
MEX3C
CCDC71L
ARL6IP4
PROCR
C1orf198
CHST14
RNF169
IRS2
ARHGAP11A
SPIN4
POLR1A
RAP2B
AJUBA
SAFB2
CERCAM
ELF1
CDCA7L
CAMSAP1
GTF3C2
ATF6B
MYCBP2
CRTC3
THBS1
QKI
ZNF24
GNG11
PRR11
INCENP
EXT2
DNAJC15
DDX47
TIMELESS
TOR4A
KIF18B
HAX1
KLF5
TFAP4
TPX2
EMSY
SLC38A2
RACGAP1
SLITRK5
CASP7
PARP4
ABLIM1
PPP2R5E
CEP131
ATN1
QSER1
HJURP
WNT5A
HCFC1
PSRC1
SDC1
AXL
CCNB2
MET
CENPE
ZNHIT6
KLHL21
AK2
CEP78
SUFU
PRAG1
FAT1
STAT3
AKAP13
RRP36
SDC4
TGFB2
ADAM17
AMOTL2
TMF1
MTR
NDUFA9
WDR76
OPA1
RAD54L2
GHITM
ZNF791
SLU7
EPHA2
GGA2
CRIPT
IL18
GLRX5
TARDBP
DIABLO
ANXA2
CCNB1
ZNF512B
TBC1D5
ARFGAP2
PHLDA1
SMPD1
STARD7
ERBIN
PTPRF
GPBP1
RPRD2
RTL8C
CENPF
SEMA4B
TAF9
SHROOM3
ZNF888
TIMM13
NDUFV1
MORF4L1
KCTD3
RBM27
FYTTD1
FAM83H
MLF2
PTK7
ZFAND5
NDUFS1
XIAP
ZNF148
GLT8D1
FAM83D
PPP1R9B
DCAF13
ATAD2
VASN
ENDOG
NUP214
CTNND1
POLR2A
ORC6
CDK5RAP2
NSUN5
PTPRF
FAM133A;FAM133B
CCNA2
PTPRS
PDCD4
DDX49
CDC42EP1
ROBO1
NDUFA12
POLD1
RRM2
GLG1
OFD1
HUWE1
GTF2IRD1
ITPRID2
RNF220
NUP88
PCDH7
MCM3AP
CLPB
AKAP9
SIN3A
CMC1
POM121C
NUP54
NUP153
KIAA1217
BUD13
AURKA
DSP
AURKB
POLR2B
DUSP14
CDC42EP2
HTRA2
ZCRB1
TCEAL4
KAT6A
NIPBL
BUB3
NAB1
TNFRSF12A
GPC4
ISG20L2
FBRS
EVPL
PRRC2A
C1orf131
CD320
TGFB1I1
DNA2
AP5Z1
ITGB4
SAP30BP
NSA2
FN1
RBPMS
NCOR2
CPOX
HSPG2
MID1IP1
CASP3
DIEXF
RBM12
VPS72
ICE1
RABAC1
TANC2
SLC7A2
CENPL
ASPM
PCM1
TBC1D7
ZFYVE16
NEK2
MUC16
UNC13B
HMCES
STRN4
ZWINT
SP110
TSC2
PAPOLG
GATAD2B
SIK3
EIF3C;EIF3CL
SOGA1
KLHL26
EEF2K
TPD52L1
SNAP29
STAU1
CXorf38
CDK5RAP1
NOSIP
STK4
RABGEF1
QSOX2
TNRC6A
CCDC50
ATF6
NUP62
MED10
UBE2C
PHC3
BCAR1
KRIT1
ZSWIM8
DLX2;DLX5
BIRC6
SHKBP1
WEE1
GOLIM4
BCAR3
PUM1
LIMCH1
SESN2
TNIP2

## Sheet: Down-regulated O-GlcNAcylated
SYTM_HUMAN
AGRIN_HUMAN
GRDN_HUMAN
SMG8_HUMAN
LTV1_HUMAN
WDR47_HUMAN
KBTB2_HUMAN
CD11B_HUMAN
STK3_HUMAN
CBPD_HUMAN
THAP3_HUMAN
LIPL_HUMAN
CADH2_HUMAN
DNMT1_HUMAN
VKOR1_HUMAN
OGT1_HUMAN
FBX22_HUMAN
SMC3_HUMAN
MYCB2_HUMAN
L10K_HUMAN
CNOT4_HUMAN
BCAM_HUMAN
BPTF_HUMAN
SEM3C_HUMAN
SEM3A_HUMAN
MCES_HUMAN
DERPC_HUMAN
P66A_HUMAN
CRNL1_HUMAN
BORG2_HUMAN
ESF1_HUMAN
DDX52_HUMAN
FADS1_HUMAN
SHRM3_HUMAN
K1C19_HUMAN
TAF9_HUMAN
SYNPO_HUMAN
NUCB1_HUMAN
TSC2_HUMAN
HELLS_HUMAN
BARD1_HUMAN
CSDE1_HUMAN
DI3L1_HUMAN
NDUV2_HUMAN
LYPL1_HUMAN
MICU2_HUMAN
PATZ1_HUMAN
PUM2_HUMAN
ELP2_HUMAN
SELS_HUMAN
YBOX3_HUMAN
TOB1_HUMAN
CCD12_HUMAN
PHF3_HUMAN
EIF3E_HUMAN
TP4A1_HUMAN
PHLA1_HUMAN
SZRD1_HUMAN
XPO7_HUMAN
ANLN_HUMAN
SPART_HUMAN
CENPH_HUMAN
GOGA2_HUMAN
DHX57_HUMAN
TX264_HUMAN
LACTB_HUMAN
TADBP_HUMAN
TAF7_HUMAN
CAMP1_HUMAN
FOXC1_HUMAN
DDX54_HUMAN
WIZ_HUMAN
SMC1A_HUMAN
ATF7_HUMAN
ABLM1_HUMAN
CCNB1_HUMAN
CGBP1_HUMAN
ZFR_HUMAN
ZN281_HUMAN
TTK_HUMAN
SC5A6_HUMAN
SOCS6_HUMAN
STAT3_HUMAN
NDUA4_HUMAN
ABC3B_HUMAN
COXM2_HUMAN
TF3C2_HUMAN
ELF1_HUMAN
IRS2_HUMAN
SPF30_HUMAN
SON_HUMAN
THOC6_HUMAN
KI18A_HUMAN
CA198_HUMAN
CHSTE_HUMAN
RN169_HUMAN
RHGBA_HUMAN
SPIN4_HUMAN
RAP2B_HUMAN
GPX1_HUMAN
NRG1_HUMAN
CAMP2_HUMAN
KAT6A_HUMAN
BUB3_HUMAN
NAB1_HUMAN
TENS4_HUMAN
TRIPB_HUMAN
AR6P4_HUMAN
TRIPC_HUMAN
ASH1L_HUMAN
KAD2_HUMAN
S38A2_HUMAN
CEP78_HUMAN
ATF6A_HUMAN
NUP62_HUMAN
WIPF2_HUMAN
CND2_HUMAN
F136A_HUMAN
TPD54_HUMAN
TFAP4_HUMAN
HXB7_HUMAN
UTP20_HUMAN
SRCAP_HUMAN
NIPBL_HUMAN
CDCA5_HUMAN
DPOLA_HUMAN
JUNB_HUMAN
HJURP_HUMAN
PSRC1_HUMAN
SDC1_HUMAN
PKN2_HUMAN
KIF11_HUMAN
LIMC1_HUMAN
TMF1_HUMAN
PUM1_HUMAN
METH_HUMAN
TNR6A_HUMAN
KDM3B_HUMAN
GHITM_HUMAN
SLU7_HUMAN
STRN4_HUMAN
ARIP4_HUMAN
OPA1_HUMAN
DBLOH_HUMAN
AMOL2_HUMAN
PEPL_HUMAN
DDX56_HUMAN
PARP4_HUMAN
RGAP1_HUMAN
SMAD2_HUMAN
MAN1_HUMAN
AP5Z1_HUMAN
RAVR1_HUMAN
FBRS_HUMAN
NFIA_HUMAN
GPTC4_HUMAN
CRTC3_HUMAN
SAFB2_HUMAN
CP131_HUMAN
EMSY_HUMAN
KLF5_HUMAN
HAX1_HUMAN
WNT5A_HUMAN
KI18B_HUMAN
PRC2A_HUMAN
DDX47_HUMAN
QSER1_HUMAN
UFO_HUMAN
ATN1_HUMAN
TOR4A_HUMAN
TPX2_HUMAN
TSP1_HUMAN
PRR11_HUMAN
ICE1_HUMAN
INCE_HUMAN
QKI_HUMAN
HCFC1_HUMAN
SKT_HUMAN
CCD50_HUMAN
MLF2_HUMAN
XIAP_HUMAN
JUND_HUMAN
CENPF_HUMAN
RPRD2_HUMAN
TCAL4_HUMAN
AURKB_HUMAN
MET_HUMAN
CENPE_HUMAN
CLPB_HUMAN
AKAP9_HUMAN
P121C_HUMAN
COXM1_HUMAN
ADA17_HUMAN
RN220_HUMAN
GANP_HUMAN
NU153_HUMAN
DUS14_HUMAN
RPB2_HUMAN
SP130_HUMAN
ATAD2_HUMAN
TGFB2_HUMAN
NUP88_HUMAN
AJUBA_HUMAN
PCDH7_HUMAN
NDUAC_HUMAN
AURKA_HUMAN
DESP_HUMAN
ZN148_HUMAN
EPCR_HUMAN
MO4L1_HUMAN
P66B_HUMAN
NEB2_HUMAN
NSUN5_HUMAN
Z512B_HUMAN
PTPRF_HUMAN
DCA13_HUMAN
NU214_HUMAN
CTND1_HUMAN
RPB1_HUMAN
FA83D_HUMAN
CK5P2_HUMAN
VASN_HUMAN
GL8D1_HUMAN
BORG5_HUMAN
BUB1B_HUMAN
CO3A1_HUMAN
EF2K_HUMAN
ITPI2_HUMAN
RBM27_HUMAN
NDUS1_HUMAN
MINT_HUMAN
FND3B_HUMAN
SYNEM_HUMAN
PTK7_HUMAN
M1IP1_HUMAN
S30BP_HUMAN
CASP3_HUMAN
NCOR2_HUMAN
HEM6_HUMAN
PGBM_HUMAN
FINC_HUMAN
NSA2_HUMAN
EVPL_HUMAN
RBPMS_HUMAN
CA131_HUMAN
CD320_HUMAN
ITB4_HUMAN
NDUV1_HUMAN
TGFI1_HUMAN
DPOD1_HUMAN
ERBIN_HUMAN
ZN888_HUMAN
ASM_HUMAN
HUWE1_HUMAN
PHC3_HUMAN
GSLG1_HUMAN
OFD1_HUMAN
RIR2_HUMAN
ROBO1_HUMAN
ELF2_HUMAN
SIN3A_HUMAN
NUP54_HUMAN
GRPE2_HUMAN
RABX5_HUMAN
QSOX2_HUMAN
STK4_HUMAN
UN13B_HUMAN
CX038_HUMAN
SNP29_HUMAN
STAU1_HUMAN
MED10_HUMAN
FAT1_HUMAN
AKP13_HUMAN
VPS72_HUMAN
RBM12_HUMAN
ZSWM8_HUMAN
BIRC6_HUMAN
BCAR1_HUMAN
WEE1_HUMAN
FBX9_HUMAN
SESN2_HUMAN
TNIP2_HUMAN
TBCD5_HUMAN
ARFG2_HUMAN
MICU1_HUMAN
KDM4A_HUMAN
BUD31_HUMAN
PDCD4_HUMAN
NOSIP_HUMAN
SDA1_HUMAN
COA7_HUMAN
PARP2_HUMAN
EPHA2_HUMAN
TANC2_HUMAN
GLRX5_HUMAN
AKP8L_HUMAN
MELK_HUMAN
NDUA9_HUMAN
SIK3_HUMAN
GGA2_HUMAN
ASPM_HUMAN
IL18_HUMAN
PCM1_HUMAN
PAPOG_HUMAN
SOGA1_HUMAN
HMCES_HUMAN
ZFY16_HUMAN
MUC16_HUMAN
NECT3_HUMAN
MYC_HUMAN
RING2_HUMAN
